# Supplementary material for: Meta-analyses of host metagenomes from colorectal cancer patients reveal strong relationship between colorectal cancer-associated species
Source: Royal Society of Chemistry journal article supplement (doi:10.1039/d3mo00021d), 2023-03-27
Supplement: d3mo00021d1.pdf [file d3mo00021d1.pdf]

## Meta-analyses of host metagenomes from colorectal cancer patients reveal strong relationship between colorectal cancer-associated species

Manuel Adrian Riveros Escalona, Joice de Faria Poloni, Mathias J.Krause,d and Márcio Dorn

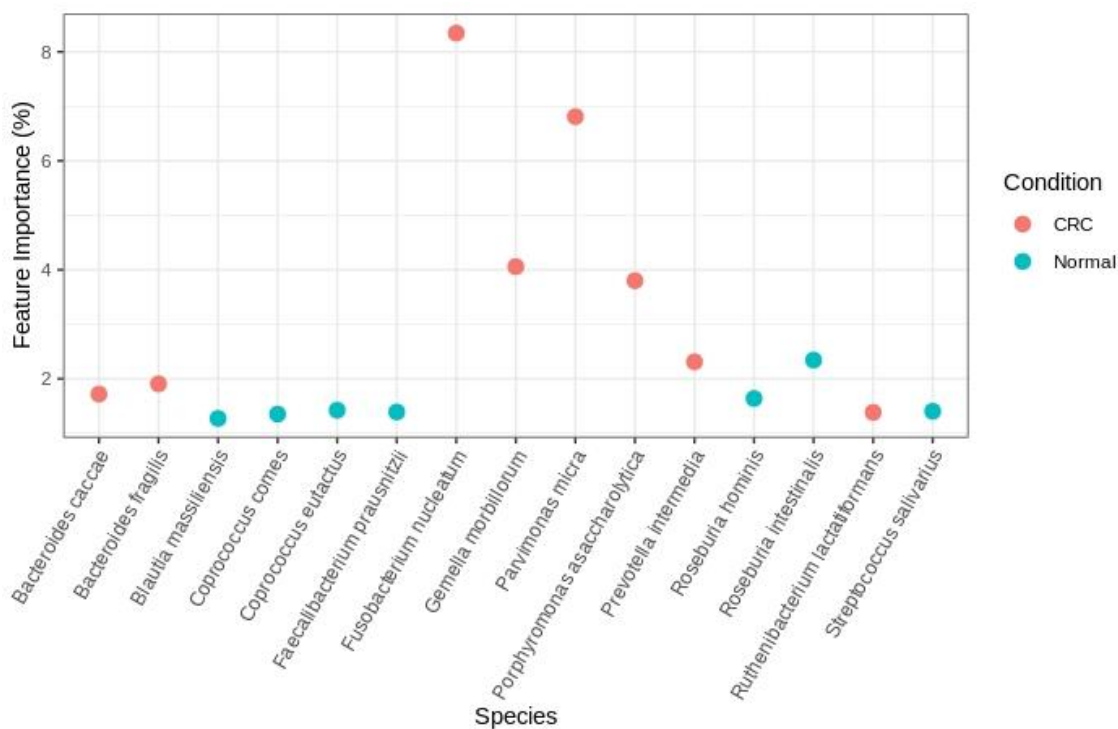

**Figure S1** – Top 15 species based on importance estimates using Random Forest classification on the taxonomic profile of the validation dataset. Species association to condition is based only in significant differential abundance ( $p < 0.05$ ) without filtering for  $|LFC| > 0.5$

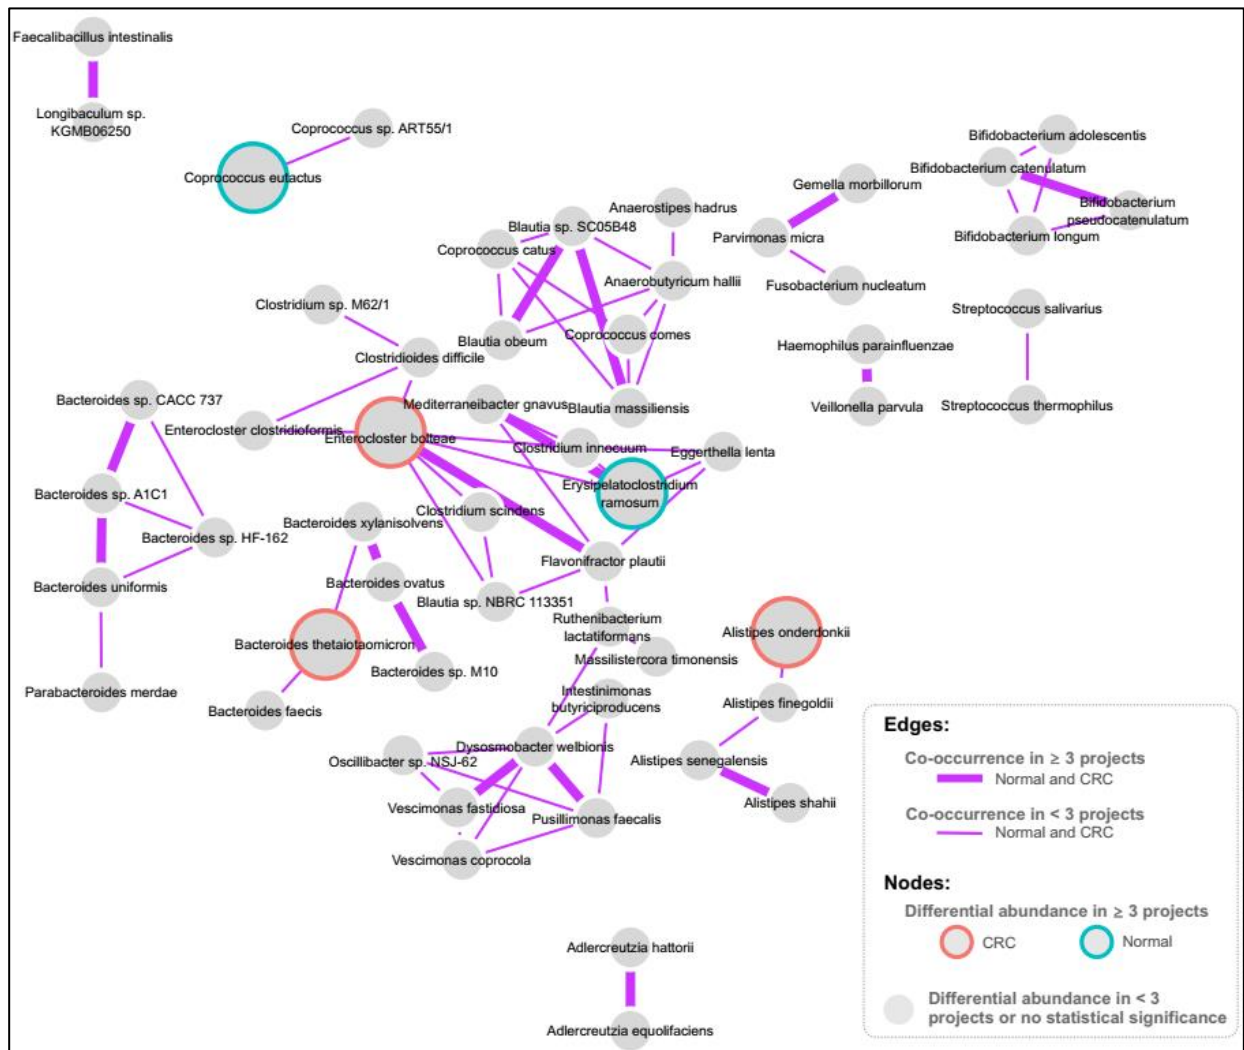

**Figure S2** – Co-abundance network showing species and co-abundances observed in both Normal and CRC conditions. Large nodes and thick edges indicate species prevalent in 3 or more projects. Nodes with colored circles represent species with significant differential abundance in Normal (blue) or CRC (red) conditions.

**Table S1** – Metadata for each sample retained for analyses. Number of raw and filtered reads represent the total amount of reads from multiple sequencing runs and from both paired-end files.

| sample_ID    | project_ID | instrument_model    | age | sex    | BMI     | BMI_status  | country | phenotype           | raw_read_count | filtered_read_count |
|--------------|------------|---------------------|-----|--------|---------|-------------|---------|---------------------|----------------|---------------------|
| SAMD00114722 | PRJDB4176  | Illumina HiSeq 2500 | 64  | Male   | 22.46   | normal      | Japan   | Colorectal Neoplasm | 59090417       | 34918046            |
| SAMD00114724 | PRJDB4176  | Illumina HiSeq 2500 | 66  | Female | 22.6003 | normal      | Japan   | Colorectal Neoplasm | 45773031       | 29165608            |
| SAMD00114727 | PRJDB4176  | Illumina HiSeq 2500 | 61  | Male   | 28.2933 | pre-obesity | Japan   | Colorectal Neoplasm | 63653548       | 41815434            |
| SAMD00114731 | PRJDB4176  | Illumina HiSeq 2500 | 70  | Female | 21.9076 | normal      | Japan   | Colorectal Neoplasm | 65573845       | 43411924            |
| SAMD00114734 | PRJDB4176  | Illumina HiSeq 2500 | 72  | Male   | 22.1367 | normal      | Japan   | Health              | 83428881       | 55274160            |
| SAMD00114737 | PRJDB4176  | Illumina HiSeq 2500 | 62  | Female | 21.0828 | normal      | Japan   | Colorectal Neoplasm | 16099789       | 11050136            |
| SAMD00114753 | PRJDB4176  | Illumina HiSeq 2500 | 65  | Male   | 21.3039 | normal      | Japan   | Colorectal Neoplasm | 35052326       | 26443436            |
| SAMD00114755 | PRJDB4176  | Illumina HiSeq 2500 | 59  | Male   | 25.4581 | pre-obesity | Japan   | Colorectal Neoplasm | 44720362       | 30959734            |
| SAMD00114760 | PRJDB4176  | Illumina HiSeq 2500 | 78  | Male   | 22.68   | normal      | Japan   | Colorectal Neoplasm | 14668832       | 9804492             |
| SAMD00114761 | PRJDB4176  | Illumina HiSeq 2500 | 30  | Male   | 25.6896 | pre-obesity | Japan   | Colorectal Neoplasm | 76400153       | 50243560            |
| SAMD00114763 | PRJDB4176  | Illumina HiSeq 2500 | 69  | Female | 23.5556 | normal      | Japan   | Colorectal Neoplasm | 59813996       | 39799150            |
| SAMD00114765 | PRJDB4176  | Illumina HiSeq 2500 | 57  | Female | 18.369  | normal      | Japan   | Colorectal Neoplasm | 60293448       | 44500258            |
| SAMD00114767 | PRJDB4176  | Illumina HiSeq 2500 | 38  | Male   | 24.3911 | normal      | Japan   | Colorectal Neoplasm | 51680790       | 38482470            |
| SAMD00114770 | PRJDB4176  | Illumina HiSeq 2500 | 73  | Male   | 25.8166 | pre-obesity | Japan   | Health              | 78080141       | 56678848            |
| SAMD00114778 | PRJDB4176  | Illumina HiSeq 2500 | 59  | Female | 20.0288 | normal      | Japan   | Health              | 34878732       | 22111598            |
| SAMD00114781 | PRJDB4176  | Illumina HiSeq 2500 | 64  | Male   | 20.5191 | normal      | Japan   | Health              | 28408932       | 18789210            |
| SAMD00114782 | PRJDB4176  | Illumina HiSeq 2500 | 44  | Female | 26.6728 | pre-obesity | Japan   | Colorectal Neoplasm | 49789119       | 32605558            |
| SAMD00114783 | PRJDB4176  | Illumina HiSeq 2500 | 50  | Female | 20.3428 | normal      | Japan   | Health              | 41692181       | 27101708            |
| SAMD00114792 | PRJDB4176  | Illumina HiSeq 2500 | 67  | Female | 26.0417 | pre-obesity | Japan   | Health              | 101364988      | 67366892            |
| SAMD00114798 | PRJDB4176  | Illumina HiSeq 2500 | 45  | Male   | 22.2222 | normal      | Japan   | Health              | 28071775       | 18601624            |
| SAMD00114803 | PRJDB4176  | Illumina HiSeq 2500 | 62  | Male   | 24.6181 | normal      | Japan   | Colorectal Neoplasm | 32744535       | 22561532            |
| SAMD00114805 | PRJDB4176  | Illumina HiSeq 2500 | 46  | Male   | 19.1512 | normal      | Japan   | Colorectal Neoplasm | 45226958       | 24605106            |
| SAMD00114813 | PRJDB4176  | Illumina HiSeq 2500 | 70  | Female | 17.3484 | underweight | Japan   | Colorectal Neoplasm | 39561620       | 18803874            |
| SAMD00114825 | PRJDB4176  | Illumina HiSeq 2500 | 70  | Male   | 20.5761 | normal      | Japan   | Colorectal Neoplasm | 43062649       | 22851676            |
| SAMD00114826 | PRJDB4176  | Illumina HiSeq 2500 | 63  | Female | 17.4818 | underweight | Japan   | Colorectal Neoplasm | 44488702       | 23920266            |

|              |           |                     |    |        |         |             |       |                     |          |          |
|--------------|-----------|---------------------|----|--------|---------|-------------|-------|---------------------|----------|----------|
| SAMD00114829 | PRJDB4176 | Illumina HiSeq 2500 | 65 | Female | 19.8189 | normal      | Japan | Health              | 49772576 | 21546604 |
| SAMD00114834 | PRJDB4176 | Illumina HiSeq 2500 | 76 | Male   | 22.1003 | normal      | Japan | Health              | 40112171 | 27477192 |
| SAMD00114840 | PRJDB4176 | Illumina HiSeq 2500 | 69 | Male   | 21.5139 | normal      | Japan | Colorectal Neoplasm | 36702095 | 24914916 |
| SAMD00114842 | PRJDB4176 | Illumina HiSeq 2500 | 76 | Female | 23.4221 | normal      | Japan | Health              | 37763014 | 23367104 |
| SAMD00114843 | PRJDB4176 | Illumina HiSeq 2500 | 53 | Female | 18.662  | normal      | Japan | Health              | 34261461 | 21526580 |
| SAMD00114849 | PRJDB4176 | Illumina HiSeq 2500 | 45 | Female | 23.4224 | normal      | Japan | Colorectal Neoplasm | 30750797 | 20400024 |
| SAMD00114859 | PRJDB4176 | Illumina HiSeq 2500 | 75 | Female | 22.6667 | normal      | Japan | Health              | 40695554 | 26942900 |
| SAMD00114862 | PRJDB4176 | Illumina HiSeq 2500 | 78 | Male   | 22.8624 | normal      | Japan | Health              | 45454146 | 30881070 |
| SAMD00114863 | PRJDB4176 | Illumina HiSeq 2500 | 59 | Female | 22.6562 | normal      | Japan | Colorectal Neoplasm | 33271872 | 21766592 |
| SAMD00114865 | PRJDB4176 | Illumina HiSeq 2500 | 45 | Male   | 23.9512 | normal      | Japan | Health              | 34808755 | 23725802 |
| SAMD00114871 | PRJDB4176 | Illumina HiSeq 2500 | 64 | Male   | 23.1084 | normal      | Japan | Colorectal Neoplasm | 42716789 | 29858186 |
| SAMD00114874 | PRJDB4176 | Illumina HiSeq 2500 | 76 | Male   | 21.7993 | normal      | Japan | Health              | 42066421 | 30249486 |
| SAMD00114880 | PRJDB4176 | Illumina HiSeq 2500 | 42 | Female | 25.5937 | pre-obesity | Japan | Health              | 71087499 | 37403490 |
| SAMD00114884 | PRJDB4176 | Illumina HiSeq 2500 | 32 | Female | 22.3478 | normal      | Japan | Colorectal Neoplasm | 31626257 | 16049036 |
| SAMD00114892 | PRJDB4176 | Illumina HiSeq 2500 | 49 | Female | 19.3821 | normal      | Japan | Colorectal Neoplasm | 41235983 | 27436662 |
| SAMD00114893 | PRJDB4176 | Illumina HiSeq 2500 | 67 | Female | 20.1746 | normal      | Japan | Colorectal Neoplasm | 37227591 | 27362896 |
| SAMD00114895 | PRJDB4176 | Illumina HiSeq 2500 | 49 | Female | 22.3081 | normal      | Japan | Health              | 40634557 | 27921844 |
| SAMD00114912 | PRJDB4176 | Illumina HiSeq 2500 | 78 | Male   | 25.9095 | pre-obesity | Japan | Colorectal Neoplasm | 40775477 | 28463236 |
| SAMD00114915 | PRJDB4176 | Illumina HiSeq 2500 | 54 | Female | 20.5688 | normal      | Japan | Colorectal Neoplasm | 24956278 | 16820818 |
| SAMD00114918 | PRJDB4176 | Illumina HiSeq 2500 | 42 | Male   | 26.1738 | pre-obesity | Japan | Health              | 42451940 | 24881232 |
| SAMD00114920 | PRJDB4176 | Illumina HiSeq 2500 | 59 | Female | 20.9566 | normal      | Japan | Colorectal Neoplasm | 47219293 | 26921254 |
| SAMD00114929 | PRJDB4176 | Illumina HiSeq 2500 | 40 | Male   | 22.9819 | normal      | Japan | Health              | 42980208 | 29305674 |
| SAMD00114931 | PRJDB4176 | Illumina HiSeq 2500 | 70 | Male   | 24.2424 | normal      | Japan | Colorectal Neoplasm | 42612588 | 29413992 |
| SAMD00114938 | PRJDB4176 | Illumina HiSeq 2500 | 76 | Male   | 25.9695 | pre-obesity | Japan | Health              | 36826545 | 26063166 |
| SAMD00114946 | PRJDB4176 | Illumina HiSeq 2500 | 46 | Female | 17.4449 | underweight | Japan | Colorectal Neoplasm | 32161882 | 23307568 |
| SAMD00114950 | PRJDB4176 | Illumina HiSeq 2500 | 49 | Female | 21.2306 | normal      | Japan | Health              | 41784614 | 24785518 |
| SAMD00114953 | PRJDB4176 | Illumina HiSeq 2500 | 63 | Male   | 22.0581 | normal      | Japan | Health              | 60639270 | 34051902 |
| SAMD00114954 | PRJDB4176 | Illumina HiSeq 2500 | 62 | Male   | 25.5937 | pre-obesity | Japan | Colorectal Neoplasm | 28288613 | 15925654 |

|              |           |                     |    |         |         |             |        |                     |          |          |
|--------------|-----------|---------------------|----|---------|---------|-------------|--------|---------------------|----------|----------|
| SAMD00114959 | PRJDB4176 | Illumina HiSeq 2500 | 49 | Male    | 27.3982 | pre-obesity | Japan  | Health              | 49007962 | 25466518 |
| SAMD00114964 | PRJDB4176 | Illumina HiSeq 2500 | 75 | Female  | 22.2222 | normal      | Japan  | Colorectal Neoplasm | 37401630 | 18361034 |
| SAMD00114966 | PRJDB4176 | Illumina HiSeq 2500 | 73 | Female  | 20.5457 | normal      | Japan  | Colorectal Neoplasm | 50469959 | 23735614 |
| SAMD00114967 | PRJDB4176 | Illumina HiSeq 2500 | 51 | Male    | 28.3848 | pre-obesity | Japan  | Health              | 43995136 | 25133248 |
| SAMD00114970 | PRJDB4176 | Illumina HiSeq 2500 | 66 | Female  | 25.4109 | pre-obesity | Japan  | Health              | 57886876 | 41116822 |
| SAMD00114974 | PRJDB4176 | Illumina HiSeq 2500 | 71 | Female  | 18.0172 | normal      | Japan  | Health              | 54696311 | 39434650 |
| SAMD00114977 | PRJDB4176 | Illumina HiSeq 2500 | 66 | Male    | 23.6652 | normal      | Japan  | Health              | 65782482 | 46076322 |
| SAMD00114982 | PRJDB4176 | Illumina HiSeq 2500 | 64 | Female  | 23.1911 | normal      | Japan  | Health              | 42020781 | 28952416 |
| SAMD00114983 | PRJDB4176 | Illumina HiSeq 2500 | 77 | Female  | 18.7305 | normal      | Japan  | Health              | 64870388 | 43749488 |
| SAMD00114994 | PRJDB4176 | Illumina HiSeq 2500 | 44 | Male    | 22.0522 | normal      | Japan  | Health              | 36042754 | 23576512 |
| SAMD00114997 | PRJDB4176 | Illumina HiSeq 2500 | 74 | Male    | 20.6852 | normal      | Japan  | Health              | 55367955 | 36192632 |
| SAMD00114998 | PRJDB4176 | Illumina HiSeq 2500 | 70 | Male    | 23.6614 | normal      | Japan  | Health              | 49149970 | 34332192 |
| SAMD00115000 | PRJDB4176 | Illumina HiSeq 2500 | 55 | Male    | 24.5779 | normal      | Japan  | Colorectal Neoplasm | 47224591 | 31863824 |
| SAMD00115001 | PRJDB4176 | Illumina HiSeq 2500 | 70 | Male    | 25.7117 | pre-obesity | Japan  | Health              | 44449006 | 30477124 |
| SAMD00115002 | PRJDB4176 | Illumina HiSeq 2500 | 75 | Male    | 22.3081 | normal      | Japan  | Health              | 51934467 | 35705730 |
| SAMD00115008 | PRJDB4176 | Illumina HiSeq 2500 | 76 | Male    | 23.7954 | normal      | Japan  | Health              | 52986931 | 36457938 |
| SAMD00115009 | PRJDB4176 | Illumina HiSeq 2500 | 76 | Male    | 25.8806 | pre-obesity | Japan  | Health              | 48805992 | 32150974 |
| SAMD00115013 | PRJDB4176 | Illumina HiSeq 2500 | 28 | Male    | 26.2976 | pre-obesity | Japan  | Colorectal Neoplasm | 47371744 | 28829272 |
| SAMD00115020 | PRJDB4176 | Illumina HiSeq 2500 | 69 | Female  | 25.6369 | pre-obesity | Japan  | Colorectal Neoplasm | 39198440 | 26076540 |
| SAMD00115022 | PRJDB4176 | Illumina HiSeq 2500 | 73 | Female  | 20.7031 | normal      | Japan  | Health              | 56154694 | 33342354 |
| SAMD00115023 | PRJDB4176 | Illumina HiSeq 2500 | 77 | Female  | 23.634  | normal      | Japan  | Health              | 53530490 | 35962820 |
| SAMD00115035 | PRJDB4176 | Illumina HiSeq 2500 | 51 | Male    | 20.7612 | normal      | Japan  | Colorectal Neoplasm | 47574725 | 29672932 |
| SAMD00154991 | PRJDB4176 | Illumina HiSeq 2500 | 65 | Male    | 21.5645 | normal      | Japan  | Health              | 41645440 | 28158742 |
| SAMD00154992 | PRJDB4176 | Illumina HiSeq 2500 | 66 | Female  | 22.3478 | normal      | Japan  | Health              | 31930957 | 20099636 |
| SAMD00154993 | PRJDB4176 | Illumina HiSeq 2500 | 48 | Male    | 23.03   | normal      | Japan  | Colorectal Neoplasm | 34115970 | 20583688 |
| SAMD00154994 | PRJDB4176 | Illumina HiSeq 2500 | 65 | Male    | 21.3839 | normal      | Japan  | Colorectal Neoplasm | 57941751 | 33606664 |
| SAMD00154995 | PRJDB4176 | Illumina HiSeq 2500 | 70 | Male    | 18.9619 | normal      | Japan  | Colorectal Neoplasm | 24917710 | 14869956 |
| SAMEA2466887 | PRJEB6070 | Illumina            | 52 | Missing | 20      | normal      | France | Health              | 19986368 | 5337097  |

|              |           |          |    |         |     |             |        |                     |          |          |
|--------------|-----------|----------|----|---------|-----|-------------|--------|---------------------|----------|----------|
| SAMEA2466888 | PRJEB6070 | Illumina | 37 | Missing | 18  | underweight | France | Health              | 17061220 | 14939009 |
| SAMEA2466890 | PRJEB6070 | Illumina | 54 | Missing | 26  | pre-obesity | France | Health              | 20549262 | 17993180 |
| SAMEA2466891 | PRJEB6070 | Illumina | 65 | Missing | 30  | pre-obesity | France | Health              | 18098042 | 4233547  |
| SAMEA2466892 | PRJEB6070 | Illumina | 57 | Missing | 24  | normal      | France | Health              | 19114044 | 4787080  |
| SAMEA2466894 | PRJEB6070 | Illumina | 53 | Missing | 30  | pre-obesity | France | Health              | 18758530 | 3038905  |
| SAMEA2466896 | PRJEB6070 | Illumina | 53 | Missing | 32  | obesity     | France | Health              | 19620360 | 3054385  |
| SAMEA2466897 | PRJEB6070 | Illumina | 68 | Missing | 26  | pre-obesity | France | Health              | 12682770 | 11105186 |
| SAMEA2466898 | PRJEB6070 | Illumina | 59 | Missing | 25  | normal      | France | Health              | 18340586 | 4482781  |
| SAMEA2466900 | PRJEB6070 | Illumina | 72 | Missing | 24  | normal      | France | Health              | 22108336 | 19358324 |
| SAMEA2466901 | PRJEB6070 | Illumina | 55 | Missing | 20  | normal      | France | Health              | 16959354 | 2721063  |
| SAMEA2466902 | PRJEB6070 | Illumina | 64 | Missing | 20  | normal      | France | Health              | 26732516 | 23407312 |
| SAMEA2466903 | PRJEB6070 | Illumina | 59 | Missing | 25  | normal      | France | Health              | 32191604 | 28187355 |
| SAMEA2466904 | PRJEB6070 | Illumina | 72 | Missing | 37  | obesity     | France | Colorectal Neoplasm | 12358354 | 10821123 |
| SAMEA2466907 | PRJEB6070 | Illumina | 64 | Missing | 27  | pre-obesity | France | Health              | 21765302 | 19057960 |
| SAMEA2466908 | PRJEB6070 | Illumina | 62 | Missing | 21  | normal      | France | Colorectal Neoplasm | 16479220 | 16447360 |
| SAMEA2466909 | PRJEB6070 | Illumina | 59 | Missing | 25  | normal      | France | Health              | 5886008  | 5153859  |
| SAMEA2466911 | PRJEB6070 | Illumina | 29 | Missing | 24  | normal      | France | Health              | 21272924 | 19623145 |
| SAMEA2466912 | PRJEB6070 | Illumina | 25 | Missing | 24  | normal      | France | Health              | 28842928 | 26671966 |
| SAMEA2466913 | PRJEB6070 | Illumina | 63 | Missing | 23  | normal      | France | Health              | 22115900 | 19364947 |
| SAMEA2466915 | PRJEB6070 | Illumina | 58 | Missing | 24  | normal      | France | Colorectal Neoplasm | 15625268 | 14172976 |
| SAMEA2466916 | PRJEB6070 | Illumina | 87 | Missing | 32  | obesity     | France | Colorectal Neoplasm | 24577894 | 23413716 |
| SAMEA2466917 | PRJEB6070 | Illumina | 63 | Missing | 22  | normal      | France | Colorectal Neoplasm | 26937436 | 25411603 |
| SAMEA2466922 | PRJEB6070 | Illumina | 79 | Missing | 30  | pre-obesity | France | Colorectal Neoplasm | 21889844 | 14175396 |
| SAMEA2466926 | PRJEB6070 | Illumina | 70 | Missing | 26  | pre-obesity | France | Colorectal Neoplasm | 11559066 | 10121257 |
| SAMEA2466927 | PRJEB6070 | Illumina | 63 | Missing | 31  | obesity     | France | Colorectal Neoplasm | 44100700 | 38615102 |
| SAMEA2466928 | PRJEB6070 | Illumina | 50 | Missing | 24  | normal      | France | Colorectal Neoplasm | 45282976 | 39650317 |
| SAMEA2466930 | PRJEB6070 | Illumina | 76 | Missing | -99 | missing     | France | Colorectal Neoplasm | 17561018 | 15376638 |
| SAMEA2466931 | PRJEB6070 | Illumina | 73 | Missing | 24  | normal      | France | Colorectal Neoplasm | 21107240 | 18481753 |

|              |           |          |    |         |    |             |        |                     |           |          |
|--------------|-----------|----------|----|---------|----|-------------|--------|---------------------|-----------|----------|
| SAMEA2466932 | PRJEB6070 | Illumina | 59 | Missing | 27 | pre-obesity | France | Colorectal Neoplasm | 21939664  | 19210633 |
| SAMEA2466933 | PRJEB6070 | Illumina | 50 | Missing | 25 | normal      | France | Health              | 38601854  | 33800247 |
| SAMEA2466934 | PRJEB6070 | Illumina | 85 | Missing | 20 | normal      | France | Colorectal Neoplasm | 22781814  | 19948030 |
| SAMEA2466936 | PRJEB6070 | Illumina | 73 | Missing | 26 | pre-obesity | France | Colorectal Neoplasm | 19532884  | 17103228 |
| SAMEA2466937 | PRJEB6070 | Illumina | 48 | Missing | 24 | normal      | France | Colorectal Neoplasm | 13315724  | 11659408 |
| SAMEA2466938 | PRJEB6070 | Illumina | 76 | Missing | 25 | normal      | France | Colorectal Neoplasm | 24126968  | 21125863 |
| SAMEA2466940 | PRJEB6070 | Illumina | 44 | Missing | 26 | pre-obesity | France | Health              | 20897712  | 18298287 |
| SAMEA2466941 | PRJEB6070 | Illumina | 59 | Missing | 20 | normal      | France | Colorectal Neoplasm | 24460120  | 21417575 |
| SAMEA2466942 | PRJEB6070 | Illumina | 63 | Missing | 25 | normal      | France | Colorectal Neoplasm | 24431280  | 23578623 |
| SAMEA2466944 | PRJEB6070 | Illumina | 80 | Missing | 29 | pre-obesity | France | Colorectal Neoplasm | 9002166   | 7882405  |
| SAMEA2466946 | PRJEB6070 | Illumina | 44 | Missing | 20 | normal      | France | Colorectal Neoplasm | 71232782  | 62372279 |
| SAMEA2466947 | PRJEB6070 | Illumina | 78 | Missing | 19 | normal      | France | Colorectal Neoplasm | 24548106  | 21494616 |
| SAMEA2466948 | PRJEB6070 | Illumina | 63 | Missing | 29 | pre-obesity | France | Colorectal Neoplasm | 20664182  | 18093806 |
| SAMEA2466954 | PRJEB6070 | Illumina | 87 | Missing | 15 | underweight | France | Colorectal Neoplasm | 23729286  | 20777648 |
| SAMEA2466955 | PRJEB6070 | Illumina | 56 | Missing | 23 | normal      | France | Colorectal Neoplasm | 117226114 | 56128854 |
| SAMEA2466956 | PRJEB6070 | Illumina | 73 | Missing | 17 | underweight | France | Colorectal Neoplasm | 5707002   | 4997119  |
| SAMEA2466957 | PRJEB6070 | Illumina | 60 | Missing | 26 | pre-obesity | France | Colorectal Neoplasm | 46589448  | 40794280 |
| SAMEA2466961 | PRJEB6070 | Illumina | 46 | Missing | 29 | pre-obesity | France | Health              | 24990526  | 21882004 |
| SAMEA2466963 | PRJEB6070 | Illumina | 72 | Missing | 22 | normal      | France | Colorectal Neoplasm | 18221720  | 16800536 |
| SAMEA2466964 | PRJEB6070 | Illumina | 55 | Missing | 25 | normal      | France | Colorectal Neoplasm | 27388274  | 23981501 |
| SAMEA2466965 | PRJEB6070 | Illumina | 35 | Missing | 23 | normal      | France | Health              | 21123106  | 18495645 |
| SAMEA2466968 | PRJEB6070 | Illumina | 80 | Missing | 23 | normal      | France | Colorectal Neoplasm | 20921584  | 18319190 |
| SAMEA2466970 | PRJEB6070 | Illumina | 51 | Missing | 24 | normal      | France | Colorectal Neoplasm | 18998892  | 16635658 |
| SAMEA2466972 | PRJEB6070 | Illumina | 64 | Missing | 21 | normal      | France | Colorectal Neoplasm | 15511156  | 13581754 |
| SAMEA2466973 | PRJEB6070 | Illumina | 51 | Missing | 30 | pre-obesity | France | Colorectal Neoplasm | 10854306  | 9504161  |
| SAMEA2466976 | PRJEB6070 | Illumina | 67 | Missing | 25 | normal      | France | Colorectal Neoplasm | 9418402   | 8246866  |
| SAMEA2466978 | PRJEB6070 | Illumina | 65 | Missing | 30 | pre-obesity | France | Health              | 6324736   | 5538015  |
| SAMEA2466979 | PRJEB6070 | Illumina | 67 | Missing | 25 | normal      | France | Health              | 19690786  | 17241489 |

|              |           |          |    |         |     |             |        |                     |          |          |
|--------------|-----------|----------|----|---------|-----|-------------|--------|---------------------|----------|----------|
| SAMEA2466980 | PRJEB6070 | Illumina | 52 | Missing | 24  | normal      | France | Health              | 12267644 | 10741696 |
| SAMEA2466981 | PRJEB6070 | Illumina | 60 | Missing | 28  | pre-obesity | France | Health              | 22307032 | 19532305 |
| SAMEA2466982 | PRJEB6070 | Illumina | 49 | Missing | 23  | normal      | France | Health              | 7086658  | 6205163  |
| SAMEA2466983 | PRJEB6070 | Illumina | 45 | Missing | 28  | pre-obesity | France | Colorectal Neoplasm | 12882250 | 11279853 |
| SAMEA2466984 | PRJEB6070 | Illumina | 79 | Missing | 22  | normal      | France | Colorectal Neoplasm | 38571186 | 33773393 |
| SAMEA2466985 | PRJEB6070 | Illumina | 38 | Missing | 22  | normal      | France | Health              | 4156454  | 3639441  |
| SAMEA2466986 | PRJEB6070 | Illumina | 64 | Missing | 30  | pre-obesity | France | Colorectal Neoplasm | 18693340 | 16368113 |
| SAMEA2466987 | PRJEB6070 | Illumina | 69 | Missing | 24  | normal      | France | Colorectal Neoplasm | 61990744 | 54279839 |
| SAMEA2466988 | PRJEB6070 | Illumina | 69 | Missing | 30  | pre-obesity | France | Colorectal Neoplasm | 11955142 | 10468066 |
| SAMEA2466989 | PRJEB6070 | Illumina | 75 | Missing | 37  | obesity     | France | Colorectal Neoplasm | 21272542 | 18626493 |
| SAMEA2466990 | PRJEB6070 | Illumina | 69 | Missing | 25  | normal      | France | Colorectal Neoplasm | 3925874  | 3437542  |
| SAMEA2466991 | PRJEB6070 | Illumina | 68 | Missing | 23  | normal      | France | Colorectal Neoplasm | 9236066  | 8087210  |
| SAMEA2466992 | PRJEB6070 | Illumina | 65 | Missing | 26  | pre-obesity | France | Colorectal Neoplasm | 21913200 | 19187461 |
| SAMEA2466993 | PRJEB6070 | Illumina | 62 | Missing | 26  | pre-obesity | France | Colorectal Neoplasm | 25562422 | 22382763 |
| SAMEA2466996 | PRJEB6070 | Illumina | 73 | Missing | 40  | obesity     | France | Colorectal Neoplasm | 12935132 | 11326157 |
| SAMEA2466997 | PRJEB6070 | Illumina | 82 | Missing | 24  | normal      | France | Colorectal Neoplasm | 20941592 | 18336709 |
| SAMEA2466998 | PRJEB6070 | Illumina | 74 | Missing | 19  | normal      | France | Colorectal Neoplasm | 19567758 | 17133764 |
| SAMEA2467000 | PRJEB6070 | Illumina | 81 | Missing | 39  | obesity     | France | Colorectal Neoplasm | 1258924  | 1102329  |
| SAMEA2467001 | PRJEB6070 | Illumina | 74 | Missing | 26  | pre-obesity | France | Colorectal Neoplasm | 11126284 | 9742308  |
| SAMEA2467002 | PRJEB6070 | Illumina | 65 | Missing | 24  | normal      | France | Colorectal Neoplasm | 16043020 | 14047461 |
| SAMEA2467004 | PRJEB6070 | Illumina | 53 | Missing | 25  | normal      | France | Colorectal Neoplasm | 13293354 | 11639820 |
| SAMEA2467005 | PRJEB6070 | Illumina | 67 | Missing | 28  | pre-obesity | France | Colorectal Neoplasm | 5108208  | 4472808  |
| SAMEA2467007 | PRJEB6070 | Illumina | 54 | Missing | 22  | normal      | France | Colorectal Neoplasm | 5235554  | 4584314  |
| SAMEA2467009 | PRJEB6070 | Illumina | 56 | Missing | -99 | missing     | France | Colorectal Neoplasm | 20109128 | 17607794 |
| SAMEA2467010 | PRJEB6070 | Illumina | 56 | Missing | -99 | missing     | France | Health              | 18695850 | 16370311 |
| SAMEA2467011 | PRJEB6070 | Illumina | 70 | Missing | 22  | normal      | France | Health              | 14837768 | 12992128 |
| SAMEA2467012 | PRJEB6070 | Illumina | 80 | Missing | 21  | normal      | France | Health              | 16222260 | 14204406 |
| SAMEA2467013 | PRJEB6070 | Illumina | 74 | Missing | 27  | pre-obesity | France | Health              | 17155648 | 15021691 |

|              |           |          |    |         |     |             |        |        |          |          |
|--------------|-----------|----------|----|---------|-----|-------------|--------|--------|----------|----------|
| SAMEA2467014 | PRJEB6070 | Illumina | 62 | Missing | 21  | normal      | France | Health | 15564038 | 13628058 |
| SAMEA2467015 | PRJEB6070 | Illumina | 63 | Missing | 27  | pre-obesity | France | Health | 16895200 | 14793640 |
| SAMEA2467016 | PRJEB6070 | Illumina | 69 | Missing | 25  | normal      | France | Health | 15688354 | 13736911 |
| SAMEA2467017 | PRJEB6070 | Illumina | 61 | Missing | 24  | normal      | France | Health | 18118842 | 15865075 |
| SAMEA2467018 | PRJEB6070 | Illumina | 68 | Missing | 25  | normal      | France | Health | 15592326 | 13652828 |
| SAMEA2467019 | PRJEB6070 | Illumina | 63 | Missing | 21  | normal      | France | Health | 15751474 | 13792180 |
| SAMEA2467020 | PRJEB6070 | Illumina | 62 | Missing | 24  | normal      | France | Health | 14098976 | 12345233 |
| SAMEA2467021 | PRJEB6070 | Illumina | 65 | Missing | 24  | normal      | France | Health | 14269376 | 12494437 |
| SAMEA2467022 | PRJEB6070 | Illumina | 70 | Missing | 25  | normal      | France | Health | 17188860 | 15050772 |
| SAMEA2467023 | PRJEB6070 | Illumina | 66 | Missing | 28  | pre-obesity | France | Health | 14918630 | 13062931 |
| SAMEA2467024 | PRJEB6070 | Illumina | 63 | Missing | 25  | normal      | France | Health | 9907200  | 8674863  |
| SAMEA2467025 | PRJEB6070 | Illumina | 67 | Missing | 27  | pre-obesity | France | Health | 14275312 | 12499634 |
| SAMEA2467026 | PRJEB6070 | Illumina | 61 | Missing | 23  | normal      | France | Health | 19314122 | 16911677 |
| SAMEA2467027 | PRJEB6070 | Illumina | 71 | Missing | 23  | normal      | France | Health | 12777324 | 11187978 |
| SAMEA2467028 | PRJEB6070 | Illumina | 63 | Missing | -99 | missing     | France | Health | 15840986 | 13870557 |
| SAMEA2467029 | PRJEB6070 | Illumina | 84 | Missing | 23  | normal      | France | Health | 15102216 | 13223682 |
| SAMEA2467030 | PRJEB6070 | Illumina | 62 | Missing | 23  | normal      | France | Health | 16148320 | 14139663 |
| SAMEA2467031 | PRJEB6070 | Illumina | 61 | Missing | 23  | normal      | France | Health | 14987012 | 13122808 |
| SAMEA2467032 | PRJEB6070 | Illumina | 61 | Missing | 34  | obesity     | France | Health | 14609324 | 12792099 |
| SAMEA2467033 | PRJEB6070 | Illumina | 67 | Missing | 23  | normal      | France | Health | 14626542 | 12807176 |
| SAMEA2467034 | PRJEB6070 | Illumina | 63 | Missing | 22  | normal      | France | Health | 13855312 | 12131877 |
| SAMEA2467035 | PRJEB6070 | Illumina | 67 | Missing | 21  | normal      | France | Health | 17689824 | 15489422 |
| SAMEA2467036 | PRJEB6070 | Illumina | 77 | Missing | 22  | normal      | France | Health | 16045800 | 14049895 |
| SAMEA2467037 | PRJEB6070 | Illumina | 67 | Missing | 28  | pre-obesity | France | Health | 17640862 | 15446550 |
| SAMEA2467038 | PRJEB6070 | Illumina | 62 | Missing | 20  | normal      | France | Health | 17291262 | 15140437 |
| SAMEA2467039 | PRJEB6070 | Illumina | 72 | Missing | 25  | normal      | France | Health | 17818474 | 15602070 |
| SAMEA2467040 | PRJEB6070 | Illumina | 64 | Missing | 30  | pre-obesity | France | Health | 18329426 | 16049465 |
| SAMEA2467041 | PRJEB6070 | Illumina | 66 | Missing | 25  | normal      | France | Health | 12159440 | 10646952 |

|              |           |          |    |         |    |             |         |                     |          |          |
|--------------|-----------|----------|----|---------|----|-------------|---------|---------------------|----------|----------|
| SAMEA2467042 | PRJEB6070 | Illumina | 74 | Missing | 27 | pre-obesity | France  | Health              | 16899776 | 14797647 |
| SAMEA2467043 | PRJEB6070 | Illumina | 72 | Missing | 28 | pre-obesity | Germany | Colorectal Neoplasm | 15403508 | 13487496 |
| SAMEA2467044 | PRJEB6070 | Illumina | 55 | Missing | 28 | pre-obesity | Germany | Colorectal Neoplasm | 14444682 | 12647937 |
| SAMEA2467045 | PRJEB6070 | Illumina | 53 | Missing | 31 | obesity     | Germany | Colorectal Neoplasm | 16794772 | 14705704 |
| SAMEA2467046 | PRJEB6070 | Illumina | 77 | Missing | 26 | pre-obesity | Germany | Colorectal Neoplasm | 12021338 | 10526028 |
| SAMEA2467047 | PRJEB6070 | Illumina | 70 | Missing | 25 | normal      | Germany | Colorectal Neoplasm | 34558782 | 30260084 |
| SAMEA2467048 | PRJEB6070 | Illumina | 67 | Missing | 30 | pre-obesity | Germany | Colorectal Neoplasm | 13568352 | 11880612 |
| SAMEA2467049 | PRJEB6070 | Illumina | 34 | Missing | 27 | pre-obesity | Germany | Colorectal Neoplasm | 16354142 | 14319883 |
| SAMEA2467050 | PRJEB6070 | Illumina | 79 | Missing | 26 | pre-obesity | Germany | Colorectal Neoplasm | 15553532 | 13618859 |
| SAMEA2467051 | PRJEB6070 | Illumina | 66 | Missing | 31 | obesity     | Germany | Colorectal Neoplasm | 17018346 | 14901468 |
| SAMEA2467052 | PRJEB6070 | Illumina | 73 | Missing | 22 | normal      | Germany | Colorectal Neoplasm | 11809190 | 10340268 |
| SAMEA2467053 | PRJEB6070 | Illumina | 58 | Missing | 32 | obesity     | Germany | Colorectal Neoplasm | 18365300 | 16080877 |
| SAMEA2467054 | PRJEB6070 | Illumina | 59 | Missing | 24 | normal      | Germany | Colorectal Neoplasm | 14422704 | 12628693 |
| SAMEA2467055 | PRJEB6070 | Illumina | 87 | Missing | 22 | normal      | Germany | Colorectal Neoplasm | 13433942 | 11762921 |
| SAMEA2467056 | PRJEB6070 | Illumina | 71 | Missing | 30 | pre-obesity | Germany | Colorectal Neoplasm | 14436054 | 12640382 |
| SAMEA2467057 | PRJEB6070 | Illumina | 41 | Missing | 22 | normal      | Germany | Colorectal Neoplasm | 13737102 | 12028371 |
| SAMEA2467058 | PRJEB6070 | Illumina | 42 | Missing | 27 | pre-obesity | Germany | Colorectal Neoplasm | 12130978 | 10622030 |
| SAMEA2467059 | PRJEB6070 | Illumina | 66 | Missing | 26 | pre-obesity | Germany | Colorectal Neoplasm | 18838912 | 16495577 |
| SAMEA2467060 | PRJEB6070 | Illumina | 72 | Missing | 24 | normal      | Germany | Colorectal Neoplasm | 15139862 | 13256645 |
| SAMEA2467061 | PRJEB6070 | Illumina | 69 | Missing | 28 | pre-obesity | Germany | Colorectal Neoplasm | 19439298 | 17021283 |
| SAMEA2467062 | PRJEB6070 | Illumina | 53 | Missing | 32 | obesity     | Germany | Colorectal Neoplasm | 14548692 | 12739009 |
| SAMEA2467063 | PRJEB6070 | Illumina | 74 | Missing | 26 | pre-obesity | Germany | Colorectal Neoplasm | 15085366 | 13208927 |
| SAMEA2467064 | PRJEB6070 | Illumina | 56 | Missing | 27 | pre-obesity | Germany | Colorectal Neoplasm | 8329924  | 7293781  |
| SAMEA2467065 | PRJEB6070 | Illumina | 66 | Missing | 23 | normal      | Germany | Colorectal Neoplasm | 14599164 | 12783203 |
| SAMEA2467066 | PRJEB6070 | Illumina | 42 | Missing | 35 | obesity     | Germany | Colorectal Neoplasm | 19140306 | 16759482 |
| SAMEA2467067 | PRJEB6070 | Illumina | 51 | Missing | 28 | pre-obesity | Germany | Colorectal Neoplasm | 16416026 | 14374069 |
| SAMEA2467068 | PRJEB6070 | Illumina | 65 | Missing | 28 | pre-obesity | Germany | Colorectal Neoplasm | 25629144 | 22441186 |
| SAMEA2467069 | PRJEB6070 | Illumina | 51 | Missing | 30 | pre-obesity | Germany | Colorectal Neoplasm | 15794202 | 13829593 |

|              |           |                     |    |         |       |             |         |                     |          |          |
|--------------|-----------|---------------------|----|---------|-------|-------------|---------|---------------------|----------|----------|
| SAMEA2467070 | PRJEB6070 | Illumina            | 58 | Missing | 25    | normal      | Germany | Colorectal Neoplasm | 16224082 | 14206001 |
| SAMEA2467071 | PRJEB6070 | Illumina            | 49 | Missing | 30    | pre-obesity | Germany | Colorectal Neoplasm | 28049000 | 24560041 |
| SAMEA2467072 | PRJEB6070 | Illumina            | 62 | Missing | 22    | normal      | Germany | Colorectal Neoplasm | 18820358 | 16479331 |
| SAMEA2467073 | PRJEB6070 | Illumina            | 62 | Missing | 27    | pre-obesity | Germany | Colorectal Neoplasm | 7653968  | 6701906  |
| SAMEA2467074 | PRJEB6070 | Illumina            | 68 | Missing | 23    | normal      | Germany | Colorectal Neoplasm | 15506400 | 13577590 |
| SAMEA2467075 | PRJEB6070 | Illumina            | 43 | Missing | 22    | normal      | Germany | Colorectal Neoplasm | 13937902 | 12204194 |
| SAMEA2467076 | PRJEB6070 | Illumina            | 35 | Missing | 22    | normal      | Germany | Colorectal Neoplasm | 11416014 | 9995999  |
| SAMEA2467077 | PRJEB6070 | Illumina            | 75 | Missing | 28    | pre-obesity | Germany | Colorectal Neoplasm | 12881600 | 11279284 |
| SAMEA2467078 | PRJEB6070 | Illumina            | 63 | Missing | 25    | normal      | Germany | Colorectal Neoplasm | 12713840 | 11132391 |
| SAMEA2467079 | PRJEB6070 | Illumina            | 90 | Missing | 28    | pre-obesity | Germany | Colorectal Neoplasm | 15585230 | 13646614 |
| SAMEA2467080 | PRJEB6070 | Illumina            | 69 | Missing | 24    | normal      | Germany | Colorectal Neoplasm | 16672120 | 14598308 |
| SAMEA2467081 | PRJEB6070 | Illumina            | 49 | Missing | 26    | pre-obesity | Germany | Health              | 27657860 | 24217554 |
| SAMEA2467082 | PRJEB6070 | Illumina            | 34 | Missing | 23    | normal      | Germany | Health              | 31333412 | 27435912 |
| SAMEA2467083 | PRJEB6070 | Illumina            | 30 | Missing | 31    | obesity     | Germany | Health              | 23593688 | 20658916 |
| SAMEA2467084 | PRJEB6070 | Illumina            | 37 | Missing | 25    | normal      | Germany | Health              | 16549564 | 14490997 |
| SAMEA2467085 | PRJEB6070 | Illumina            | 34 | Missing | 21    | normal      | Germany | Health              | 20575868 | 10405973 |
| SAMEA3136623 | PRJEB7774 | Illumina HiSeq 2000 | 63 | Male    | 30.4  | obesity     | Austria | Health              | 1000629  | 876163   |
| SAMEA3136624 | PRJEB7774 | Illumina HiSeq 2000 | 65 | Male    | 22.03 | normal      | Austria | Health              | 47262846 | 16851865 |
| SAMEA3136626 | PRJEB7774 | Illumina HiSeq 2000 | 72 | Female  | 30    | pre-obesity | Austria | Health              | 2412624  | 2112523  |
| SAMEA3136627 | PRJEB7774 | Illumina HiSeq 2000 | 84 | Female  | 27.77 | pre-obesity | Austria | Colorectal Neoplasm | 973573   | 852472   |
| SAMEA3136628 | PRJEB7774 | Illumina HiSeq 2000 | 72 | Female  | 24.22 | normal      | Austria | Colorectal Neoplasm | 56240176 | 22240799 |
| SAMEA3136629 | PRJEB7774 | Illumina HiSeq 2000 | 68 | Male    | 29.8  | pre-obesity | Austria | Health              | 61330000 | 24064825 |
| SAMEA3136630 | PRJEB7774 | Illumina HiSeq 2000 | 67 | Male    | 29.4  | pre-obesity | Austria | Colorectal Neoplasm | 53235370 | 27017707 |
| SAMEA3136632 | PRJEB7774 | Illumina HiSeq 2000 | 67 | Male    | 23.14 | normal      | Austria | Health              | 39025470 | 34171170 |
| SAMEA3136633 | PRJEB7774 | Illumina HiSeq 2000 | 70 | Male    | 23.67 | normal      | Austria | Health              | 45171026 | 32008167 |
| SAMEA3136635 | PRJEB7774 | Illumina HiSeq 2000 | 70 | Female  | 22.67 | normal      | Austria | Health              | 57108240 | 30105753 |
| SAMEA3136636 | PRJEB7774 | Illumina HiSeq 2000 | 66 | Male    | 30.02 | obesity     | Austria | Health              | 51098750 | 25800701 |
| SAMEA3136637 | PRJEB7774 | Illumina HiSeq 2000 | 69 | Male    | 29.94 | pre-obesity | Austria | Colorectal Neoplasm | 798802   | 699441   |

|              |           |                     |    |        |       |             |         |                     |          |          |
|--------------|-----------|---------------------|----|--------|-------|-------------|---------|---------------------|----------|----------|
| SAMEA3136638 | PRJEB7774 | Illumina HiSeq 2000 | 71 | Male   | 29.74 | pre-obesity | Austria | Colorectal Neoplasm | 1096236  | 959877   |
| SAMEA3136639 | PRJEB7774 | Illumina HiSeq 2000 | 68 | Male   | 32.25 | obesity     | Austria | Colorectal Neoplasm | 1249111  | 1093737  |
| SAMEA3136640 | PRJEB7774 | Illumina HiSeq 2000 | 66 | Male   | 29.98 | pre-obesity | Austria | Health              | 1120976  | 981540   |
| SAMEA3136641 | PRJEB7774 | Illumina HiSeq 2000 | 70 | Male   | 31.25 | obesity     | Austria | Health              | 1267704  | 1110017  |
| SAMEA3136642 | PRJEB7774 | Illumina HiSeq 2000 | 72 | Female | 24.22 | normal      | Austria | Colorectal Neoplasm | 1050976  | 920247   |
| SAMEA3136643 | PRJEB7774 | Illumina HiSeq 2000 | 69 | Female | 22.4  | normal      | Austria | Health              | 887422   | 777037   |
| SAMEA3136644 | PRJEB7774 | Illumina HiSeq 2000 | 63 | Male   | 30.9  | obesity     | Austria | Health              | 57709000 | 29918810 |
| SAMEA3136645 | PRJEB7774 | Illumina HiSeq 2000 | 71 | Female | 29    | pre-obesity | Austria | Health              | 688532   | 602887   |
| SAMEA3136646 | PRJEB7774 | Illumina HiSeq 2000 | 72 | Male   | 29.03 | pre-obesity | Austria | Health              | 989504   | 866422   |
| SAMEA3136647 | PRJEB7774 | Illumina HiSeq 2000 | 58 | Male   | 27.76 | pre-obesity | Austria | Colorectal Neoplasm | 997135   | 873103   |
| SAMEA3136648 | PRJEB7774 | Illumina HiSeq 2000 | 52 | Female | 27.14 | pre-obesity | Austria | Colorectal Neoplasm | 2028082  | 1775813  |
| SAMEA3136649 | PRJEB7774 | Illumina HiSeq 2000 | 74 | Male   | 26.37 | pre-obesity | Austria | Colorectal Neoplasm | 821564   | 719371   |
| SAMEA3136650 | PRJEB7774 | Illumina HiSeq 2000 | 74 | Female | 28.5  | pre-obesity | Austria | Health              | 1050429  | 919768   |
| SAMEA3136651 | PRJEB7774 | Illumina HiSeq 2000 | 64 | Male   | 29.3  | pre-obesity | Austria | Health              | 923475   | 808606   |
| SAMEA3136652 | PRJEB7774 | Illumina HiSeq 2000 | 71 | Male   | 29.04 | pre-obesity | Austria | Health              | 845226   | 740090   |
| SAMEA3136653 | PRJEB7774 | Illumina HiSeq 2000 | 73 | Female | 29.75 | pre-obesity | Austria | Colorectal Neoplasm | 62445124 | 21261165 |
| SAMEA3136654 | PRJEB7774 | Illumina HiSeq 2000 | 68 | Male   | 22.2  | normal      | Austria | Health              | 55960176 | 27246536 |
| SAMEA3136655 | PRJEB7774 | Illumina HiSeq 2000 | 70 | Female | 31    | obesity     | Austria | Health              | 1620920  | 1419297  |
| SAMEA3136656 | PRJEB7774 | Illumina HiSeq 2000 | 70 | Male   | 31.6  | obesity     | Austria | Health              | 1236343  | 1082557  |
| SAMEA3136657 | PRJEB7774 | Illumina HiSeq 2000 | 60 | Female | 30.08 | obesity     | Austria | Colorectal Neoplasm | 1354458  | 1185980  |
| SAMEA3136658 | PRJEB7774 | Illumina HiSeq 2000 | 86 | Female | 20.5  | normal      | Austria | Colorectal Neoplasm | 1207182  | 1057023  |
| SAMEA3136659 | PRJEB7774 | Illumina HiSeq 2000 | 72 | Male   | 28.41 | pre-obesity | Austria | Colorectal Neoplasm | 64862254 | 29327245 |
| SAMEA3136660 | PRJEB7774 | Illumina HiSeq 2000 | 43 | Male   | 22.68 | normal      | Austria | Colorectal Neoplasm | 1063319  | 931055   |
| SAMEA3136662 | PRJEB7774 | Illumina HiSeq 2000 | 68 | Female | 22.4  | normal      | Austria | Health              | 55572074 | 28653319 |
| SAMEA3136663 | PRJEB7774 | Illumina HiSeq 2000 | 66 | Male   | 30.3  | obesity     | Austria | Health              | 1311047  | 1147968  |
| SAMEA3136664 | PRJEB7774 | Illumina HiSeq 2000 | 67 | Female | 30    | pre-obesity | Austria | Health              | 841486   | 736815   |
| SAMEA3136665 | PRJEB7774 | Illumina HiSeq 2000 | 72 | Male   | 29.03 | pre-obesity | Austria | Health              | 45406014 | 23923499 |
| SAMEA3136666 | PRJEB7774 | Illumina HiSeq 2000 | 70 | Male   | 31.25 | obesity     | Austria | Health              | 59573400 | 23272727 |

|              |           |                     |    |        |       |             |         |                     |          |          |
|--------------|-----------|---------------------|----|--------|-------|-------------|---------|---------------------|----------|----------|
| SAMEA3136667 | PRJEB7774 | Illumina HiSeq 2000 | 72 | Male   | 31.8  | obesity     | Austria | Health              | 58730900 | 24640089 |
| SAMEA3136668 | PRJEB7774 | Illumina HiSeq 2000 | 67 | Male   | 22.79 | normal      | Austria | Health              | 2119194  | 1855592  |
| SAMEA3136669 | PRJEB7774 | Illumina HiSeq 2000 | 73 | Female | 26.56 | pre-obesity | Austria | Health              | 577988   | 506093   |
| SAMEA3136670 | PRJEB7774 | Illumina HiSeq 2000 | 74 | Male   | 24.34 | normal      | Austria | Colorectal Neoplasm | 642016   | 562157   |
| SAMEA3136671 | PRJEB7774 | Illumina HiSeq 2000 | 69 | Female | 28.3  | pre-obesity | Austria | Health              | 1029926  | 901816   |
| SAMEA3136672 | PRJEB7774 | Illumina HiSeq 2000 | 52 | Male   | 25.73 | pre-obesity | Austria | Colorectal Neoplasm | 805331   | 705157   |
| SAMEA3136673 | PRJEB7774 | Illumina HiSeq 2000 | 64 | Male   | 22.78 | normal      | Austria | Health              | 707032   | 619086   |
| SAMEA3136675 | PRJEB7774 | Illumina HiSeq 2000 | 60 | Male   | 26.64 | pre-obesity | Austria | Colorectal Neoplasm | 750885   | 657484   |
| SAMEA3136676 | PRJEB7774 | Illumina HiSeq 2000 | 82 | Male   | 30.47 | obesity     | Austria | Colorectal Neoplasm | 46848766 | 28013273 |
| SAMEA3136677 | PRJEB7774 | Illumina HiSeq 2000 | 68 | Male   | 22.2  | normal      | Austria | Health              | 1003849  | 878982   |
| SAMEA3136679 | PRJEB7774 | Illumina HiSeq 2000 | 75 | Female | 31    | obesity     | Austria | Health              | 40326384 | 22488255 |
| SAMEA3136680 | PRJEB7774 | Illumina HiSeq 2000 | 74 | Female | 28.3  | pre-obesity | Austria | Health              | 645164   | 564913   |
| SAMEA3136681 | PRJEB7774 | Illumina HiSeq 2000 | 70 | Male   | 28.72 | pre-obesity | Austria | Health              | 529613   | 463735   |
| SAMEA3136682 | PRJEB7774 | Illumina HiSeq 2000 | 69 | Female | 28.3  | pre-obesity | Austria | Health              | 58199812 | 34945991 |
| SAMEA3136683 | PRJEB7774 | Illumina HiSeq 2000 | 69 | Female | 22.4  | normal      | Austria | Health              | 49574276 | 28469727 |
| SAMEA3136684 | PRJEB7774 | Illumina HiSeq 2000 | 73 | Male   | 24.82 | normal      | Austria | Colorectal Neoplasm | 55822274 | 27318979 |
| SAMEA3136685 | PRJEB7774 | Illumina HiSeq 2000 | 71 | Female | 29    | pre-obesity | Austria | Health              | 49561528 | 33256048 |
| SAMEA3136686 | PRJEB7774 | Illumina HiSeq 2000 | 73 | Female | 32    | obesity     | Austria | Health              | 513641   | 449750   |
| SAMEA3136687 | PRJEB7774 | Illumina HiSeq 2000 | 66 | Male   | 29.98 | pre-obesity | Austria | Health              | 43035328 | 37260502 |
| SAMEA3136688 | PRJEB7774 | Illumina HiSeq 2000 | 74 | Female | 29.17 | pre-obesity | Austria | Colorectal Neoplasm | 60455004 | 37065832 |
| SAMEA3136689 | PRJEB7774 | Illumina HiSeq 2000 | 82 | Male   | 30.47 | obesity     | Austria | Colorectal Neoplasm | 605263   | 529976   |
| SAMEA3136690 | PRJEB7774 | Illumina HiSeq 2000 | 63 | Male   | 25.88 | pre-obesity | Austria | Colorectal Neoplasm | 864213   | 756715   |
| SAMEA3136691 | PRJEB7774 | Illumina HiSeq 2000 | 65 | Female | 23.31 | normal      | Austria | Colorectal Neoplasm | 986297   | 863613   |
| SAMEA3136692 | PRJEB7774 | Illumina HiSeq 2000 | 65 | Male   | 31.22 | obesity     | Austria | Health              | 838838   | 734497   |
| SAMEA3136693 | PRJEB7774 | Illumina HiSeq 2000 | 71 | Female | 29    | pre-obesity | Austria | Health              | 696207   | 609607   |
| SAMEA3136694 | PRJEB7774 | Illumina HiSeq 2000 | 72 | Female | 28.7  | pre-obesity | Austria | Health              | 974418   | 853212   |
| SAMEA3136695 | PRJEB7774 | Illumina HiSeq 2000 | 65 | Male   | 28.9  | pre-obesity | Austria | Health              | 1192584  | 1044241  |
| SAMEA3136696 | PRJEB7774 | Illumina HiSeq 2000 | 74 | Female | 28.5  | pre-obesity | Austria | Health              | 54288710 | 25058842 |

|              |           |                     |    |        |       |             |         |                     |          |          |
|--------------|-----------|---------------------|----|--------|-------|-------------|---------|---------------------|----------|----------|
| SAMEA3136697 | PRJEB7774 | Illumina HiSeq 2000 | 46 | Male   | 30.86 | obesity     | Austria | Colorectal Neoplasm | 55343590 | 31800577 |
| SAMEA3136699 | PRJEB7774 | Illumina HiSeq 2000 | 64 | Female | 24.09 | normal      | Austria | Colorectal Neoplasm | 953760   | 835124   |
| SAMEA3136700 | PRJEB7774 | Illumina HiSeq 2000 | 72 | Male   | 28.41 | pre-obesity | Austria | Colorectal Neoplasm | 1003875  | 879005   |
| SAMEA3136701 | PRJEB7774 | Illumina HiSeq 2000 | 73 | Female | 29.75 | pre-obesity | Austria | Colorectal Neoplasm | 1366774  | 1196764  |
| SAMEA3136702 | PRJEB7774 | Illumina HiSeq 2000 | 73 | Male   | 17.99 | underweight | Austria | Colorectal Neoplasm | 932348   | 816375   |
| SAMEA3136703 | PRJEB7774 | Illumina HiSeq 2000 | 74 | Female | 28.3  | pre-obesity | Austria | Health              | 42355128 | 27825403 |
| SAMEA3136704 | PRJEB7774 | Illumina HiSeq 2000 | 84 | Male   | 27.28 | pre-obesity | Austria | Colorectal Neoplasm | 59854508 | 33281169 |
| SAMEA3136707 | PRJEB7774 | Illumina HiSeq 2000 | 63 | Male   | 34.14 | obesity     | Austria | Health              | 44964196 | 21913700 |
| SAMEA3136708 | PRJEB7774 | Illumina HiSeq 2000 | 84 | Female | 27.77 | pre-obesity | Austria | Colorectal Neoplasm | 55773544 | 29045067 |
| SAMEA3136709 | PRJEB7774 | Illumina HiSeq 2000 | 73 | Female | 32    | obesity     | Austria | Health              | 38907566 | 18326444 |
| SAMEA3136710 | PRJEB7774 | Illumina HiSeq 2000 | 74 | Male   | 26.37 | pre-obesity | Austria | Colorectal Neoplasm | 48893486 | 27897873 |
| SAMEA3136711 | PRJEB7774 | Illumina HiSeq 2000 | 74 | Female | 28.5  | pre-obesity | Austria | Health              | 1221204  | 1069301  |
| SAMEA3136712 | PRJEB7774 | Illumina HiSeq 2000 | 68 | Male   | 32    | obesity     | Austria | Health              | 1158189  | 1014124  |
| SAMEA3136713 | PRJEB7774 | Illumina HiSeq 2000 | 65 | Male   | 29.06 | pre-obesity | Austria | Health              | 796558   | 697476   |
| SAMEA3136714 | PRJEB7774 | Illumina HiSeq 2000 | 67 | Male   | 22.79 | normal      | Austria | Health              | 50768166 | 37166677 |
| SAMEA3136715 | PRJEB7774 | Illumina HiSeq 2000 | 66 | Male   | 34.04 | obesity     | Austria | Health              | 1308363  | 1145618  |
| SAMEA3136716 | PRJEB7774 | Illumina HiSeq 2000 | 84 | Female | 31.22 | obesity     | Austria | Colorectal Neoplasm | 63160316 | 27588583 |
| SAMEA3136717 | PRJEB7774 | Illumina HiSeq 2000 | 54 | Male   | 27.34 | pre-obesity | Austria | Colorectal Neoplasm | 914188   | 800474   |
| SAMEA3136718 | PRJEB7774 | Illumina HiSeq 2000 | 55 | Female | 23.34 | normal      | Austria | Colorectal Neoplasm | 632227   | 553586   |
| SAMEA3136719 | PRJEB7774 | Illumina HiSeq 2000 | 66 | Male   | 30.02 | obesity     | Austria | Health              | 1831666  | 1603829  |
| SAMEA3136720 | PRJEB7774 | Illumina HiSeq 2000 | 77 | Male   | 19.16 | normal      | Austria | Colorectal Neoplasm | 1740177  | 1523720  |
| SAMEA3136721 | PRJEB7774 | Illumina HiSeq 2000 | 72 | Female | 28.7  | pre-obesity | Austria | Health              | 65637426 | 33585489 |
| SAMEA3136722 | PRJEB7774 | Illumina HiSeq 2000 | 72 | Male   | 31.8  | obesity     | Austria | Health              | 919201   | 804863   |
| SAMEA3136723 | PRJEB7774 | Illumina HiSeq 2000 | 65 | Male   | 29.74 | pre-obesity | Austria | Colorectal Neoplasm | 723215   | 633256   |
| SAMEA3136724 | PRJEB7774 | Illumina HiSeq 2000 | 67 | Male   | 29.4  | pre-obesity | Austria | Colorectal Neoplasm | 768272   | 672708   |
| SAMEA3136725 | PRJEB7774 | Illumina HiSeq 2000 | 66 | Female | 21.7  | normal      | Austria | Health              | 1343416  | 1176311  |
| SAMEA3136727 | PRJEB7774 | Illumina HiSeq 2000 | 84 | Female | 31.22 | obesity     | Austria | Colorectal Neoplasm | 1187144  | 1039478  |
| SAMEA3136728 | PRJEB7774 | Illumina HiSeq 2000 | 69 | Female | 30    | pre-obesity | Austria | Health              | 58615384 | 28181861 |

|              |           |                     |    |        |       |             |         |                     |          |          |
|--------------|-----------|---------------------|----|--------|-------|-------------|---------|---------------------|----------|----------|
| SAMEA3136729 | PRJEB7774 | Illumina HiSeq 2000 | 64 | Male   | 29.3  | pre-obesity | Austria | Health              | 47527996 | 13420535 |
| SAMEA3136730 | PRJEB7774 | Illumina HiSeq 2000 | 46 | Male   | 28.74 | pre-obesity | Austria | Health              | 678781   | 594349   |
| SAMEA3136731 | PRJEB7774 | Illumina HiSeq 2000 | 67 | Female | 22.58 | normal      | Austria | Health              | 1146725  | 1004086  |
| SAMEA3136732 | PRJEB7774 | Illumina HiSeq 2000 | 64 | Female | 24.09 | normal      | Austria | Colorectal Neoplasm | 44249602 | 22750213 |
| SAMEA3136733 | PRJEB7774 | Illumina HiSeq 2000 | 46 | Male   | 23.15 | normal      | Austria | Health              | 1105483  | 967974   |
| SAMEA3136734 | PRJEB7774 | Illumina HiSeq 2000 | 72 | Male   | 31.8  | obesity     | Austria | Health              | 743329   | 650868   |
| SAMEA3136735 | PRJEB7774 | Illumina HiSeq 2000 | 74 | Female | 29.17 | pre-obesity | Austria | Colorectal Neoplasm | 1151888  | 1008607  |
| SAMEA3136736 | PRJEB7774 | Illumina HiSeq 2000 | 43 | Female | 22.65 | normal      | Austria | Health              | 493903   | 432467   |
| SAMEA3136737 | PRJEB7774 | Illumina HiSeq 2000 | 47 | Female | 25.78 | pre-obesity | Austria | Colorectal Neoplasm | 50738108 | 21582236 |
| SAMEA3136738 | PRJEB7774 | Illumina HiSeq 2000 | 68 | Male   | 23.45 | normal      | Austria | Health              | 918792   | 804505   |
| SAMEA3136739 | PRJEB7774 | Illumina HiSeq 2000 | 56 | Female | 20.07 | normal      | Austria | Colorectal Neoplasm | 1180838  | 1033956  |
| SAMEA3136740 | PRJEB7774 | Illumina HiSeq 2000 | 47 | Female | 25.78 | pre-obesity | Austria | Colorectal Neoplasm | 1011350  | 885550   |
| SAMEA3136741 | PRJEB7774 | Illumina HiSeq 2000 | 77 | Female | 23.5  | normal      | Austria | Colorectal Neoplasm | 775100   | 678687   |
| SAMEA3136743 | PRJEB7774 | Illumina HiSeq 2000 | 64 | Male   | 29.38 | pre-obesity | Austria | Health              | 718369   | 629013   |
| SAMEA3136744 | PRJEB7774 | Illumina HiSeq 2000 | 45 | Female | 22.15 | normal      | Austria | Colorectal Neoplasm | 765051   | 669888   |
| SAMEA3136745 | PRJEB7774 | Illumina HiSeq 2000 | 72 | Male   | 24.34 | normal      | Austria | Colorectal Neoplasm | 975423   | 854092   |
| SAMEA3136746 | PRJEB7774 | Illumina HiSeq 2000 | 56 | Female | 20.07 | normal      | Austria | Colorectal Neoplasm | 57372900 | 24021715 |
| SAMEA3136747 | PRJEB7774 | Illumina HiSeq 2000 | 73 | Male   | 29.7  | pre-obesity | Austria | Health              | 822780   | 720436   |
| SAMEA3136748 | PRJEB7774 | Illumina HiSeq 2000 | 64 | Male   | 29.35 | pre-obesity | Austria | Colorectal Neoplasm | 785424   | 687727   |
| SAMEA3136749 | PRJEB7774 | Illumina HiSeq 2000 | 73 | Male   | 24.82 | normal      | Austria | Colorectal Neoplasm | 1019982  | 893108   |
| SAMEA3136750 | PRJEB7774 | Illumina HiSeq 2000 | 69 | Female | 30    | pre-obesity | Austria | Health              | 1531659  | 1341139  |
| SAMEA3136752 | PRJEB7774 | Illumina HiSeq 2000 | 70 | Female | 22.8  | normal      | Austria | Health              | 797017   | 697878   |
| SAMEA3136753 | PRJEB7774 | Illumina HiSeq 2000 | 70 | Female | 22.8  | normal      | Austria | Health              | 41122250 | 15957187 |
| SAMEA3136754 | PRJEB7774 | Illumina HiSeq 2000 | 68 | Female | 21.7  | normal      | Austria | Health              | 57206702 | 20735007 |
| SAMEA3136755 | PRJEB7774 | Illumina HiSeq 2000 | 84 | Male   | 27.28 | pre-obesity | Austria | Colorectal Neoplasm | 1175338  | 1029140  |
| SAMEA3136756 | PRJEB7774 | Illumina HiSeq 2000 | 63 | Male   | 30.9  | obesity     | Austria | Health              | 1339476  | 1172861  |
| SAMEA3136757 | PRJEB7774 | Illumina HiSeq 2000 | 46 | Male   | 30.86 | obesity     | Austria | Colorectal Neoplasm | 995090   | 871313   |
| SAMEA3136759 | PRJEB7774 | Illumina HiSeq 2000 | 72 | Female | 26.67 | pre-obesity | Austria | Colorectal Neoplasm | 54123104 | 15319764 |

|              |            |                     |    |        |       |             |         |                     |          |          |
|--------------|------------|---------------------|----|--------|-------|-------------|---------|---------------------|----------|----------|
| SAMEA3136760 | PRJEB7774  | Illumina HiSeq 2000 | 60 | Male   | 26.64 | pre-obesity | Austria | Colorectal Neoplasm | 46523360 | 19226010 |
| SAMEA3136761 | PRJEB7774  | Illumina HiSeq 2000 | 67 | Male   | 23.14 | normal      | Austria | Health              | 796421   | 697356   |
| SAMEA3136763 | PRJEB7774  | Illumina HiSeq 2000 | 68 | Male   | 29.8  | pre-obesity | Austria | Health              | 1391334  | 1218269  |
| SAMEA3136764 | PRJEB7774  | Illumina HiSeq 2000 | 43 | Male   | 22.68 | normal      | Austria | Colorectal Neoplasm | 72405312 | 28266713 |
| SAMEA3136765 | PRJEB7774  | Illumina HiSeq 2000 | 65 | Male   | 28.03 | pre-obesity | Austria | Colorectal Neoplasm | 831673   | 728223   |
| SAMEA3136766 | PRJEB7774  | Illumina HiSeq 2000 | 68 | Female | 21.7  | normal      | Austria | Health              | 1239365  | 1085203  |
| SAMEA3136767 | PRJEB7774  | Illumina HiSeq 2000 | 65 | Male   | 28.9  | pre-obesity | Austria | Health              | 46237716 | 20307233 |
| SAMEA3136768 | PRJEB7774  | Illumina HiSeq 2000 | 71 | Male   | 29.74 | pre-obesity | Austria | Colorectal Neoplasm | 54833492 | 25766027 |
| SAMEA3136769 | PRJEB7774  | Illumina HiSeq 2000 | 60 | Female | 22.1  | normal      | Austria | Health              | 1110550  | 972411   |
| SAMEA3178936 | PRJEB7774  | Illumina HiSeq 2000 | 55 | Male   | 27.76 | pre-obesity | Austria | Health              | 47995184 | 31353428 |
| SAMEA3178937 | PRJEB7774  | Illumina HiSeq 2000 | 64 | Male   | 29.35 | pre-obesity | Austria | Colorectal Neoplasm | 40112916 | 32857847 |
| SAMEA3178938 | PRJEB7774  | Illumina HiSeq 2000 | 68 | Male   | 32    | obesity     | Austria | Health              | 64949772 | 28935282 |
| SAMEA3178939 | PRJEB7774  | Illumina HiSeq 2000 | 60 | Female | 22.1  | normal      | Austria | Health              | 59678576 | 20939050 |
| SAMEA3178940 | PRJEB7774  | Illumina HiSeq 2000 | 78 | Male   | 31.22 | obesity     | Austria | Health              | 34603738 | 20209060 |
| SAMEA3178941 | PRJEB7774  | Illumina HiSeq 2000 | 68 | Male   | 23.45 | normal      | Austria | Health              | 51026634 | 23208299 |
| SAMEA3178943 | PRJEB7774  | Illumina HiSeq 2000 | 66 | Male   | 30.3  | obesity     | Austria | Health              | 49525344 | 19750204 |
| SAMEA3178944 | PRJEB7774  | Illumina HiSeq 2000 | 73 | Male   | 29.7  | pre-obesity | Austria | Health              | 39671196 | 31472708 |
| SAMEA3541469 | PRJEB10878 | Illumina HiSeq 2000 | 64 | Male   | 23.1  | normal      | China   | Colorectal Neoplasm | 60749206 | 27350066 |
| SAMEA3541470 | PRJEB10878 | Illumina HiSeq 2000 | 73 | Male   | 23.8  | normal      | China   | Colorectal Neoplasm | 52854792 | 16904482 |
| SAMEA3541471 | PRJEB10878 | Illumina HiSeq 2000 | 67 | Female | 24.7  | normal      | China   | Colorectal Neoplasm | 59873382 | 16236302 |
| SAMEA3541472 | PRJEB10878 | Illumina HiSeq 2000 | 56 | Male   | 25.6  | pre-obesity | China   | Colorectal Neoplasm | 55761702 | 16003276 |
| SAMEA3541473 | PRJEB10878 | Illumina HiSeq 2000 | 59 | Female | 20.7  | normal      | China   | Colorectal Neoplasm | 64434830 | 14666858 |
| SAMEA3541474 | PRJEB10878 | Illumina HiSeq 2000 | 61 | Male   | 25.2  | pre-obesity | China   | Colorectal Neoplasm | 52102228 | 12867370 |
| SAMEA3541475 | PRJEB10878 | Illumina HiSeq 2000 | 60 | Male   | 23.2  | normal      | China   | Colorectal Neoplasm | 62456910 | 16234350 |
| SAMEA3541476 | PRJEB10878 | Illumina HiSeq 2000 | 73 | Female | 17.7  | underweight | China   | Colorectal Neoplasm | 60073374 | 13258372 |
| SAMEA3541477 | PRJEB10878 | Illumina HiSeq 2000 | 62 | Male   | 21.7  | normal      | China   | Health              | 61229038 | 15088496 |
| SAMEA3541478 | PRJEB10878 | Illumina HiSeq 2000 | 72 | Female | 26.3  | pre-obesity | China   | Colorectal Neoplasm | 61472286 | 14904884 |
| SAMEA3541479 | PRJEB10878 | Illumina HiSeq 2000 | 65 | Male   | 20.7  | normal      | China   | Health              | 64164216 | 18036644 |

|              |            |                     |    |        |      |             |       |                     |          |          |
|--------------|------------|---------------------|----|--------|------|-------------|-------|---------------------|----------|----------|
| SAMEA3541480 | PRJEB10878 | Illumina HiSeq 2000 | 65 | Male   | 24.8 | normal      | China | Colorectal Neoplasm | 66150638 | 17123814 |
| SAMEA3541481 | PRJEB10878 | Illumina HiSeq 2000 | 71 | Male   | 25.8 | pre-obesity | China | Colorectal Neoplasm | 60074902 | 18639490 |
| SAMEA3541482 | PRJEB10878 | Illumina HiSeq 2000 | 50 | Male   | 25.2 | pre-obesity | China | Colorectal Neoplasm | 57351612 | 13118610 |
| SAMEA3541483 | PRJEB10878 | Illumina HiSeq 2000 | 55 | Male   | 22.2 | normal      | China | Colorectal Neoplasm | 29589862 | 8178986  |
| SAMEA3541484 | PRJEB10878 | Illumina HiSeq 2000 | 77 | Male   | 21.7 | normal      | China | Colorectal Neoplasm | 58546892 | 17501556 |
| SAMEA3541485 | PRJEB10878 | Illumina HiSeq 2000 | 45 | Female | 23   | normal      | China | Colorectal Neoplasm | 56584998 | 12396372 |
| SAMEA3541486 | PRJEB10878 | Illumina HiSeq 2000 | 89 | Female | 23.7 | normal      | China | Colorectal Neoplasm | 51292156 | 14738594 |
| SAMEA3541487 | PRJEB10878 | Illumina HiSeq 2000 | 58 | Female | 21.6 | normal      | China | Health              | 54116632 | 15575598 |
| SAMEA3541488 | PRJEB10878 | Illumina HiSeq 2000 | 58 | Female | 23.9 | normal      | China | Colorectal Neoplasm | 56648482 | 8698220  |
| SAMEA3541489 | PRJEB10878 | Illumina HiSeq 2000 | 68 | Male   | 21.7 | normal      | China | Health              | 57035188 | 15259686 |
| SAMEA3541490 | PRJEB10878 | Illumina HiSeq 2000 | 64 | Female | 29.1 | pre-obesity | China | Colorectal Neoplasm | 62258080 | 17670422 |
| SAMEA3541491 | PRJEB10878 | Illumina HiSeq 2000 | 75 | Female | 28.7 | pre-obesity | China | Colorectal Neoplasm | 45637278 | 11959004 |
| SAMEA3541492 | PRJEB10878 | Illumina HiSeq 2000 | 73 | Male   | 22.7 | normal      | China | Colorectal Neoplasm | 58822118 | 10100266 |
| SAMEA3541493 | PRJEB10878 | Illumina HiSeq 2000 | 62 | Female | 21.4 | normal      | China | Health              | 56134340 | 17311674 |
| SAMEA3541494 | PRJEB10878 | Illumina HiSeq 2000 | 80 | Male   | 24   | normal      | China | Colorectal Neoplasm | 60820472 | 13220342 |
| SAMEA3541495 | PRJEB10878 | Illumina HiSeq 2000 | 67 | Male   | 23.1 | normal      | China | Colorectal Neoplasm | 61937738 | 15047782 |
| SAMEA3541496 | PRJEB10878 | Illumina HiSeq 2000 | 61 | Female | 22   | normal      | China | Colorectal Neoplasm | 59665954 | 14204468 |
| SAMEA3541497 | PRJEB10878 | Illumina HiSeq 2000 | 63 | Male   | 24.4 | normal      | China | Colorectal Neoplasm | 57476278 | 14709040 |
| SAMEA3541498 | PRJEB10878 | Illumina HiSeq 2000 | 51 | Female | 19.6 | normal      | China | Colorectal Neoplasm | 62349482 | 22672076 |
| SAMEA3541499 | PRJEB10878 | Illumina HiSeq 2000 | 64 | Male   | -99  | missing     | China | Colorectal Neoplasm | 71617186 | 29181190 |
| SAMEA3541500 | PRJEB10878 | Illumina HiSeq 2000 | 74 | Female | 28.7 | pre-obesity | China | Colorectal Neoplasm | 47029284 | 13401718 |
| SAMEA3541501 | PRJEB10878 | Illumina HiSeq 2000 | 68 | Male   | 20.4 | normal      | China | Health              | 63330138 | 25374498 |
| SAMEA3541502 | PRJEB10878 | Illumina HiSeq 2000 | 83 | Female | 30.4 | obesity     | China | Colorectal Neoplasm | 62319068 | 37104138 |
| SAMEA3541503 | PRJEB10878 | Illumina HiSeq 2000 | 70 | Male   | 24.6 | normal      | China | Colorectal Neoplasm | 72370444 | 40057888 |
| SAMEA3541504 | PRJEB10878 | Illumina HiSeq 2000 | 56 | Male   | 25.9 | pre-obesity | China | Colorectal Neoplasm | 68159682 | 37173018 |
| SAMEA3541505 | PRJEB10878 | Illumina HiSeq 2000 | 54 | Male   | 17.9 | underweight | China | Colorectal Neoplasm | 61187040 | 16520770 |
| SAMEA3541506 | PRJEB10878 | Illumina HiSeq 2000 | 74 | Male   | 26.8 | pre-obesity | China | Colorectal Neoplasm | 57034986 | 24532314 |
| SAMEA3541507 | PRJEB10878 | Illumina HiSeq 2000 | 57 | Male   | 23.2 | normal      | China | Colorectal Neoplasm | 61334626 | 34197210 |

|              |            |                     |    |        |      |             |       |                     |          |          |
|--------------|------------|---------------------|----|--------|------|-------------|-------|---------------------|----------|----------|
| SAMEA3541508 | PRJEB10878 | Illumina HiSeq 2000 | 54 | Female | 29.7 | pre-obesity | China | Colorectal Neoplasm | 50308904 | 21996212 |
| SAMEA3541509 | PRJEB10878 | Illumina HiSeq 2000 | 62 | Male   | 22.7 | normal      | China | Colorectal Neoplasm | 43205192 | 24159050 |
| SAMEA3541510 | PRJEB10878 | Illumina HiSeq 2000 | 54 | Female | 25.6 | pre-obesity | China | Colorectal Neoplasm | 68438974 | 35624968 |
| SAMEA3541511 | PRJEB10878 | Illumina HiSeq 2000 | 69 | Male   | 29   | pre-obesity | China | Colorectal Neoplasm | 72260226 | 42079266 |
| SAMEA3541512 | PRJEB10878 | Illumina HiSeq 2000 | 64 | Male   | 24.8 | normal      | China | Colorectal Neoplasm | 62569760 | 32766872 |
| SAMEA3541513 | PRJEB10878 | Illumina HiSeq 2000 | 44 | Male   | 22.5 | normal      | China | Colorectal Neoplasm | 58539128 | 17243498 |
| SAMEA3541514 | PRJEB10878 | Illumina HiSeq 2000 | 60 | Male   | 17.3 | underweight | China | Colorectal Neoplasm | 59984388 | 28880140 |
| SAMEA3541515 | PRJEB10878 | Illumina HiSeq 2000 | 73 | Male   | 24.5 | normal      | China | Colorectal Neoplasm | 53627618 | 32010090 |
| SAMEA3541516 | PRJEB10878 | Illumina HiSeq 2000 | 62 | Female | 32.5 | obesity     | China | Health              | 66064102 | 35399928 |
| SAMEA3541517 | PRJEB10878 | Illumina HiSeq 2000 | 58 | Male   | 22.3 | normal      | China | Health              | 70428992 | 42132850 |
| SAMEA3541518 | PRJEB10878 | Illumina HiSeq 2000 | 64 | Male   | 24.8 | normal      | China | Health              | 61617318 | 25212820 |
| SAMEA3541519 | PRJEB10878 | Illumina HiSeq 2000 | 65 | Female | 35.1 | obesity     | China | Health              | 68472136 | 37663122 |
| SAMEA3541520 | PRJEB10878 | Illumina HiSeq 2000 | 62 | Male   | 23.5 | normal      | China | Health              | 69534266 | 39607934 |
| SAMEA3541521 | PRJEB10878 | Illumina HiSeq 2000 | 69 | Female | 24.9 | normal      | China | Health              | 68004090 | 37969864 |
| SAMEA3541522 | PRJEB10878 | Illumina HiSeq 2000 | 55 | Male   | 26.4 | pre-obesity | China | Health              | 72077438 | 39841820 |
| SAMEA3541523 | PRJEB10878 | Illumina HiSeq 2000 | 64 | Female | 26.4 | pre-obesity | China | Health              | 59159772 | 29133944 |
| SAMEA3541524 | PRJEB10878 | Illumina HiSeq 2000 | 59 | Male   | 25.6 | pre-obesity | China | Health              | 67478554 | 40763312 |
| SAMEA3541525 | PRJEB10878 | Illumina HiSeq 2000 | 70 | Male   | 21   | normal      | China | Colorectal Neoplasm | 67318902 | 38989784 |
| SAMEA3541526 | PRJEB10878 | Illumina HiSeq 2000 | 71 | Female | 26.7 | pre-obesity | China | Health              | 63843786 | 21603192 |
| SAMEA3541527 | PRJEB10878 | Illumina HiSeq 2000 | 51 | Male   | 21.9 | normal      | China | Health              | 63808150 | 36697432 |
| SAMEA3541528 | PRJEB10878 | Illumina HiSeq 2000 | 50 | Male   | 20.5 | normal      | China | Health              | 60520634 | 35781436 |
| SAMEA3541529 | PRJEB10878 | Illumina HiSeq 2000 | 64 | Male   | 24.7 | normal      | China | Health              | 52698148 | 18292832 |
| SAMEA3541530 | PRJEB10878 | Illumina HiSeq 2000 | 50 | Male   | 23.3 | normal      | China | Health              | 52788942 | 29854694 |
| SAMEA3541531 | PRJEB10878 | Illumina HiSeq 2000 | 66 | Female | 22.4 | normal      | China | Health              | 57114396 | 29423990 |
| SAMEA3541532 | PRJEB10878 | Illumina HiSeq 2000 | 52 | Male   | 28.4 | pre-obesity | China | Health              | 58591508 | 33840976 |
| SAMEA3541533 | PRJEB10878 | Illumina HiSeq 2000 | 64 | Male   | 25.6 | pre-obesity | China | Health              | 49693868 | 21858718 |
| SAMEA3541534 | PRJEB10878 | Illumina HiSeq 2000 | 58 | Male   | 23.1 | normal      | China | Health              | 47524484 | 23581526 |
| SAMEA3541535 | PRJEB10878 | Illumina HiSeq 2000 | 64 | Female | 17.1 | underweight | China | Health              | 55499678 | 21060354 |

|              |            |                     |    |        |      |             |       |                     |          |          |
|--------------|------------|---------------------|----|--------|------|-------------|-------|---------------------|----------|----------|
| SAMEA3541536 | PRJEB10878 | Illumina HiSeq 2000 | 65 | Male   | 22.4 | normal      | China | Health              | 46313860 | 15056366 |
| SAMEA3541537 | PRJEB10878 | Illumina HiSeq 2000 | 53 | Male   | 19.7 | normal      | China | Health              | 48490500 | 13270056 |
| SAMEA3541538 | PRJEB10878 | Illumina HiSeq 2000 | 64 | Female | 21.1 | normal      | China | Health              | 56707948 | 31205946 |
| SAMEA3541539 | PRJEB10878 | Illumina HiSeq 2000 | 68 | Female | 24.9 | normal      | China | Health              | 44019090 | 13859938 |
| SAMEA3541540 | PRJEB10878 | Illumina HiSeq 2000 | 53 | Male   | 23.4 | normal      | China | Health              | 44904362 | 25335940 |
| SAMEA3541541 | PRJEB10878 | Illumina HiSeq 2000 | 64 | Female | 22.7 | normal      | China | Health              | 61595372 | 35074438 |
| SAMEA3541542 | PRJEB10878 | Illumina HiSeq 2000 | 61 | Male   | 21.5 | normal      | China | Health              | 57962360 | 21303138 |
| SAMEA3541543 | PRJEB10878 | Illumina HiSeq 2000 | 62 | Female | 21.1 | normal      | China | Health              | 56561906 | 19451774 |
| SAMEA3541544 | PRJEB10878 | Illumina HiSeq 2000 | 64 | Male   | 24.1 | normal      | China | Health              | 61955812 | 26342354 |
| SAMEA3541545 | PRJEB10878 | Illumina HiSeq 2000 | 55 | Male   | 22.3 | normal      | China | Health              | 54321366 | 20752186 |
| SAMEA3541546 | PRJEB10878 | Illumina HiSeq 2000 | 64 | Female | 22.6 | normal      | China | Health              | 77263508 | 42965194 |
| SAMEA3541547 | PRJEB10878 | Illumina HiSeq 2000 | 71 | Female | 22.6 | normal      | China | Health              | 55579348 | 33139642 |
| SAMEA3541548 | PRJEB10878 | Illumina HiSeq 2000 | 64 | Female | 22.2 | normal      | China | Health              | 59038886 | 15563346 |
| SAMEA3541549 | PRJEB10878 | Illumina HiSeq 2000 | 65 | Male   | 22.5 | normal      | China | Health              | 62784088 | 37041932 |
| SAMEA3541550 | PRJEB10878 | Illumina HiSeq 2000 | 73 | Female | 24.1 | normal      | China | Health              | 61975626 | 35657644 |
| SAMEA3541551 | PRJEB10878 | Illumina HiSeq 2000 | 54 | Male   | 27.7 | pre-obesity | China | Health              | 51471774 | 16980202 |
| SAMEA3541552 | PRJEB10878 | Illumina HiSeq 2000 | 65 | Female | 21.2 | normal      | China | Health              | 58364678 | 33013524 |
| SAMEA3541553 | PRJEB10878 | Illumina HiSeq 2000 | 60 | Male   | 22.5 | normal      | China | Health              | 60676490 | 37514810 |
| SAMEA3541554 | PRJEB10878 | Illumina HiSeq 2000 | 58 | Male   | 26.3 | pre-obesity | China | Health              | 63341086 | 39640500 |
| SAMEA3541555 | PRJEB10878 | Illumina HiSeq 2000 | 64 | Female | 21.3 | normal      | China | Health              | 55190022 | 14342044 |
| SAMEA3541556 | PRJEB10878 | Illumina HiSeq 2000 | 69 | Male   | 23.8 | normal      | China | Health              | 60252226 | 30049596 |
| SAMEA3541557 | PRJEB10878 | Illumina HiSeq 2000 | 65 | Female | 20   | normal      | China | Health              | 62929376 | 20172944 |
| SAMEA3541558 | PRJEB10878 | Illumina HiSeq 2000 | 59 | Male   | 23.7 | normal      | China | Health              | 63280364 | 23489338 |
| SAMEA3541559 | PRJEB10878 | Illumina HiSeq 2000 | 70 | Female | 22.2 | normal      | China | Health              | 43217884 | 22866608 |
| SAMEA3541560 | PRJEB10878 | Illumina HiSeq 2000 | 61 | Male   | 23.7 | normal      | China | Health              | 44188276 | 26186160 |
| SAMEA3541561 | PRJEB10878 | Illumina HiSeq 2000 | 52 | Male   | 24.6 | normal      | China | Health              | 60671012 | 37795950 |
| SAMEA3541562 | PRJEB10878 | Illumina HiSeq 2000 | 58 | Male   | 24.5 | normal      | China | Health              | 63322690 | 24313418 |
| SAMEA3541563 | PRJEB10878 | Illumina HiSeq 2000 | 60 | Male   | 20   | normal      | China | Colorectal Neoplasm | 63781394 | 22916580 |

|              |            |                     |    |        |      |             |       |                     |          |          |
|--------------|------------|---------------------|----|--------|------|-------------|-------|---------------------|----------|----------|
| SAMEA3541564 | PRJEB10878 | Illumina HiSeq 2000 | 77 | Male   | 24.5 | normal      | China | Colorectal Neoplasm | 65133586 | 23267364 |
| SAMEA3541565 | PRJEB10878 | Illumina HiSeq 2000 | 59 | Female | 27   | pre-obesity | China | Colorectal Neoplasm | 52187750 | 12193288 |
| SAMEA3541566 | PRJEB10878 | Illumina HiSeq 2000 | 71 | Female | 21.2 | normal      | China | Colorectal Neoplasm | 56903946 | 15720352 |
| SAMEA3541567 | PRJEB10878 | Illumina HiSeq 2000 | 56 | Male   | 31.3 | obesity     | China | Colorectal Neoplasm | 51245744 | 15079046 |
| SAMEA3541568 | PRJEB10878 | Illumina HiSeq 2000 | 77 | Male   | 22   | normal      | China | Colorectal Neoplasm | 51812238 | 14421338 |
| SAMEA3541569 | PRJEB10878 | Illumina HiSeq 2000 | 77 | Male   | 23.5 | normal      | China | Colorectal Neoplasm | 62149784 | 17395956 |
| SAMEA3541570 | PRJEB10878 | Illumina HiSeq 2000 | 83 | Female | 22.8 | normal      | China | Colorectal Neoplasm | 55720964 | 16694906 |
| SAMEA3541571 | PRJEB10878 | Illumina HiSeq 2000 | 79 | Female | 25.8 | pre-obesity | China | Colorectal Neoplasm | 36891208 | 13870126 |
| SAMEA3541572 | PRJEB10878 | Illumina HiSeq 2000 | 69 | Female | 28.3 | pre-obesity | China | Colorectal Neoplasm | 38931972 | 11779530 |
| SAMEA3541573 | PRJEB10878 | Illumina HiSeq 2000 | 62 | Male   | 23.5 | normal      | China | Colorectal Neoplasm | 35025672 | 13207798 |
| SAMEA3541574 | PRJEB10878 | Illumina HiSeq 2000 | 78 | Male   | 27   | pre-obesity | China | Colorectal Neoplasm | 38286210 | 14278156 |
| SAMEA3541575 | PRJEB10878 | Illumina HiSeq 2000 | 49 | Female | 22.6 | normal      | China | Colorectal Neoplasm | 38421068 | 13484862 |
| SAMEA3541576 | PRJEB10878 | Illumina HiSeq 2000 | 81 | Male   | 18.2 | normal      | China | Colorectal Neoplasm | 36345768 | 14563716 |
| SAMEA3541577 | PRJEB10878 | Illumina HiSeq 2000 | 63 | Female | 28   | pre-obesity | China | Colorectal Neoplasm | 37024436 | 10851290 |
| SAMEA3541578 | PRJEB10878 | Illumina HiSeq 2000 | 59 | Male   | 24.5 | normal      | China | Colorectal Neoplasm | 40407172 | 11690788 |
| SAMEA3541579 | PRJEB10878 | Illumina HiSeq 2000 | 73 | Male   | 22.1 | normal      | China | Colorectal Neoplasm | 42423706 | 15410678 |
| SAMEA3541580 | PRJEB10878 | Illumina HiSeq 2000 | 76 | Male   | 21.9 | normal      | China | Colorectal Neoplasm | 10961564 | 7153088  |
| SAMEA3541581 | PRJEB10878 | Illumina HiSeq 2000 | 74 | Female | 17.9 | underweight | China | Colorectal Neoplasm | 48287820 | 17234036 |
| SAMEA3541582 | PRJEB10878 | Illumina HiSeq 2000 | 51 | Male   | 26.9 | pre-obesity | China | Colorectal Neoplasm | 37627614 | 12113698 |
| SAMEA3541583 | PRJEB10878 | Illumina HiSeq 2000 | 74 | Male   | 24.2 | normal      | China | Colorectal Neoplasm | 50539146 | 33665104 |
| SAMEA3541584 | PRJEB10878 | Illumina HiSeq 2000 | 77 | Male   | 20.2 | normal      | China | Colorectal Neoplasm | 40240288 | 14067080 |
| SAMEA3541585 | PRJEB10878 | Illumina HiSeq 2000 | 34 | Male   | 19.4 | normal      | China | Colorectal Neoplasm | 44341480 | 26611696 |
| SAMEA3541586 | PRJEB10878 | Illumina HiSeq 2000 | 70 | Female | 26.7 | pre-obesity | China | Colorectal Neoplasm | 65450728 | 44641890 |
| SAMEA3541587 | PRJEB10878 | Illumina HiSeq 2000 | 83 | Female | 18.9 | normal      | China | Colorectal Neoplasm | 57315876 | 32321234 |
| SAMEA3541588 | PRJEB10878 | Illumina HiSeq 2000 | 68 | Male   | 21.5 | normal      | China | Colorectal Neoplasm | 59042440 | 36503352 |
| SAMEA3541589 | PRJEB10878 | Illumina HiSeq 2000 | 79 | Male   | 26.8 | pre-obesity | China | Colorectal Neoplasm | 58518194 | 36690524 |
| SAMEA3541590 | PRJEB10878 | Illumina HiSeq 2000 | 64 | Female | 28.3 | pre-obesity | China | Colorectal Neoplasm | 49356502 | 31264038 |
| SAMEA3541591 | PRJEB10878 | Illumina HiSeq 2000 | 67 | Male   | 24.9 | normal      | China | Colorectal Neoplasm | 51070446 | 30284078 |

|              |            |                     |    |        |      |             |       |                     |          |          |
|--------------|------------|---------------------|----|--------|------|-------------|-------|---------------------|----------|----------|
| SAMEA3541592 | PRJEB10878 | Illumina HiSeq 2000 | 61 | Male   | 23.8 | normal      | China | Health              | 58080274 | 34838950 |
| SAMEA3541593 | PRJEB10878 | Illumina HiSeq 2000 | 62 | Male   | 21.5 | normal      | China | Health              | 57219434 | 32421792 |
| SAMEA3541594 | PRJEB10878 | Illumina HiSeq 2000 | 68 | Male   | 23.7 | normal      | China | Colorectal Neoplasm | 66186116 | 38000634 |
| SAMEA3541595 | PRJEB10878 | Illumina HiSeq 2000 | 55 | Male   | 25.8 | pre-obesity | China | Colorectal Neoplasm | 58789886 | 38464762 |
| SAMEA3541596 | PRJEB10878 | Illumina HiSeq 2000 | 63 | Male   | 22.5 | normal      | China | Colorectal Neoplasm | 63339956 | 39932790 |
| SAMEA3879500 | PRJEB12449 | Illumina            | 65 | Male   | 23.5 | normal      | USA   | Health              | 3346521  | 2930254  |
| SAMEA3879501 | PRJEB12449 | Illumina            | 67 | Female | 30   | pre-obesity | USA   | Colorectal Neoplasm | 2180599  | 1909359  |
| SAMEA3879502 | PRJEB12449 | Illumina            | 58 | Male   | 26.8 | pre-obesity | USA   | Health              | 4704729  | 4119517  |
| SAMEA3879503 | PRJEB12449 | Illumina            | 48 | Male   | 26.4 | pre-obesity | USA   | Health              | 3039849  | 2661728  |
| SAMEA3879504 | PRJEB12449 | Illumina            | 57 | Male   | 25.1 | pre-obesity | USA   | Health              | 2947859  | 2581181  |
| SAMEA3879505 | PRJEB12449 | Illumina            | 31 | Male   | 19.6 | normal      | USA   | Colorectal Neoplasm | 3611600  | 3162360  |
| SAMEA3879506 | PRJEB12449 | Illumina            | 65 | Male   | 25.1 | pre-obesity | USA   | Colorectal Neoplasm | 3323729  | 2910297  |
| SAMEA3879507 | PRJEB12449 | Illumina            | 63 | Female | 28.3 | pre-obesity | USA   | Health              | 2858013  | 2502510  |
| SAMEA3879508 | PRJEB12449 | Illumina            | 89 | Female | 22.7 | normal      | USA   | Colorectal Neoplasm | 2757046  | 2414103  |
| SAMEA3879509 | PRJEB12449 | Illumina            | 68 | Male   | 22.1 | normal      | USA   | Health              | 4269290  | 3738242  |
| SAMEA3879510 | PRJEB12449 | Illumina            | 69 | Female | 20.8 | normal      | USA   | Colorectal Neoplasm | 4143653  | 3628232  |
| SAMEA3879512 | PRJEB12449 | Illumina            | 53 | Male   | 25   | normal      | USA   | Colorectal Neoplasm | 2554206  | 2236493  |
| SAMEA3879513 | PRJEB12449 | Illumina            | 60 | Male   | 33.4 | obesity     | USA   | Health              | 3076090  | 2693461  |
| SAMEA3879514 | PRJEB12449 | Illumina            | 79 | Male   | 35.2 | obesity     | USA   | Health              | 6646291  | 5819572  |
| SAMEA3879515 | PRJEB12449 | Illumina            | 61 | Male   | 24.4 | normal      | USA   | Colorectal Neoplasm | 3808424  | 2919582  |
| SAMEA3879516 | PRJEB12449 | Illumina            | 69 | Female | 27.8 | pre-obesity | USA   | Colorectal Neoplasm | 4525078  | 3962213  |
| SAMEA3879517 | PRJEB12449 | Illumina            | 42 | Male   | 22   | normal      | USA   | Colorectal Neoplasm | 2503112  | 2191755  |
| SAMEA3879518 | PRJEB12449 | Illumina            | 74 | Male   | -99  | missing     | USA   | Colorectal Neoplasm | 3435474  | 3008142  |
| SAMEA3879519 | PRJEB12449 | Illumina            | 85 | Male   | 22.8 | normal      | USA   | Colorectal Neoplasm | 2003533  | 1754318  |
| SAMEA3879520 | PRJEB12449 | Illumina            | 74 | Male   | 23.6 | normal      | USA   | Colorectal Neoplasm | 7175283  | 6282764  |
| SAMEA3879521 | PRJEB12449 | Illumina            | 70 | Male   | 25.1 | pre-obesity | USA   | Colorectal Neoplasm | 7469526  | 6540407  |
| SAMEA3879522 | PRJEB12449 | Illumina            | 36 | Male   | 21.3 | normal      | USA   | Health              | 6824873  | 5975941  |
| SAMEA3879523 | PRJEB12449 | Illumina            | 42 | Female | 27.2 | pre-obesity | USA   | Health              | 5893580  | 5160489  |

|              |            |          |    |        |      |             |     |                     |         |         |
|--------------|------------|----------|----|--------|------|-------------|-----|---------------------|---------|---------|
| SAMEA3879524 | PRJEB12449 | Illumina | 67 | Male   | 30.5 | obesity     | USA | Health              | 3278731 | 2870896 |
| SAMEA3879525 | PRJEB12449 | Illumina | 58 | Male   | 24.5 | normal      | USA | Health              | 2307220 | 2020230 |
| SAMEA3879526 | PRJEB12449 | Illumina | 68 | Female | 38.4 | obesity     | USA | Health              | 2414618 | 2114268 |
| SAMEA3879527 | PRJEB12449 | Illumina | 44 | Male   | 23.4 | normal      | USA | Colorectal Neoplasm | 2957954 | 2590020 |
| SAMEA3879528 | PRJEB12449 | Illumina | 63 | Male   | 25.4 | pre-obesity | USA | Health              | 4836478 | 4234878 |
| SAMEA3879529 | PRJEB12449 | Illumina | 65 | Male   | 21.1 | normal      | USA | Colorectal Neoplasm | 3193455 | 2796228 |
| SAMEA3879530 | PRJEB12449 | Illumina | 69 | Male   | 24.1 | normal      | USA | Health              | 7753376 | 6788949 |
| SAMEA3879531 | PRJEB12449 | Illumina | 59 | Female | 20.4 | normal      | USA | Colorectal Neoplasm | 5360030 | 4693307 |
| SAMEA3879532 | PRJEB12449 | Illumina | 59 | Male   | 23.6 | normal      | USA | Health              | 3000329 | 2627124 |
| SAMEA3879533 | PRJEB12449 | Illumina | 83 | Female | 16.8 | underweight | USA | Colorectal Neoplasm | 3012856 | 2638093 |
| SAMEA3879534 | PRJEB12449 | Illumina | 55 | Male   | 29.6 | pre-obesity | USA | Colorectal Neoplasm | 3941873 | 3451551 |
| SAMEA3879535 | PRJEB12449 | Illumina | 71 | Female | -99  | missing     | USA | Colorectal Neoplasm | 3159365 | 2766378 |
| SAMEA3879537 | PRJEB12449 | Illumina | 31 | Male   | 19.6 | normal      | USA | Colorectal Neoplasm | 2911289 | 2549160 |
| SAMEA3879538 | PRJEB12449 | Illumina | 56 | Male   | 23   | normal      | USA | Health              | 3906183 | 3420301 |
| SAMEA3879539 | PRJEB12449 | Illumina | 53 | Male   | 25.4 | pre-obesity | USA | Colorectal Neoplasm | 4472126 | 3915847 |
| SAMEA3879540 | PRJEB12449 | Illumina | 40 | Male   | 23.7 | normal      | USA | Colorectal Neoplasm | 5459458 | 4780367 |
| SAMEA3879541 | PRJEB12449 | Illumina | 39 | Male   | 23.5 | normal      | USA | Health              | 2821387 | 2470440 |
| SAMEA3879542 | PRJEB12449 | Illumina | 48 | Male   | 23.1 | normal      | USA | Health              | 3013791 | 2638912 |
| SAMEA3879543 | PRJEB12449 | Illumina | 82 | Male   | 20.5 | normal      | USA | Health              | 3655259 | 3200589 |
| SAMEA3879544 | PRJEB12449 | Illumina | 73 | Male   | 25.8 | pre-obesity | USA | Colorectal Neoplasm | 6185070 | 5415722 |
| SAMEA3879545 | PRJEB12449 | Illumina | 58 | Male   | 21.1 | normal      | USA | Colorectal Neoplasm | 7256663 | 6354021 |
| SAMEA3879546 | PRJEB12449 | Illumina | 79 | Male   | 21.3 | normal      | USA | Health              | 3582909 | 3137238 |
| SAMEA3879547 | PRJEB12449 | Illumina | 67 | Female | 18.6 | normal      | USA | Health              | 3161262 | 2768039 |
| SAMEA3879548 | PRJEB12449 | Illumina | 65 | Male   | 32.1 | obesity     | USA | Colorectal Neoplasm | 3787060 | 3315995 |
| SAMEA3879549 | PRJEB12449 | Illumina | 63 | Male   | 24   | normal      | USA | Health              | 3937304 | 3447551 |
| SAMEA3879550 | PRJEB12449 | Illumina | 63 | Male   | 24.8 | normal      | USA | Health              | 4619539 | 4044924 |
| SAMEA3879551 | PRJEB12449 | Illumina | 60 | Female | 20.5 | normal      | USA | Health              | 6132475 | 5369669 |
| SAMEA3879552 | PRJEB12449 | Illumina | 71 | Male   | 23.2 | normal      | USA | Health              | 2735752 | 2395457 |

|              |            |          |    |        |      |             |     |                     |         |         |
|--------------|------------|----------|----|--------|------|-------------|-----|---------------------|---------|---------|
| SAMEA3879553 | PRJEB12449 | Illumina | 49 | Male   | 33.4 | obesity     | USA | Health              | 3181697 | 2785932 |
| SAMEA3879554 | PRJEB12449 | Illumina | 66 | Male   | 28.2 | pre-obesity | USA | Health              | 7089302 | 6207478 |
| SAMEA3879555 | PRJEB12449 | Illumina | 55 | Female | 31.6 | obesity     | USA | Colorectal Neoplasm | 7139269 | 6251230 |
| SAMEA3879556 | PRJEB12449 | Illumina | 43 | Male   | 32   | obesity     | USA | Colorectal Neoplasm | 3682352 | 3224312 |
| SAMEA3879557 | PRJEB12449 | Illumina | 63 | Female | 25.7 | pre-obesity | USA | Colorectal Neoplasm | 3188152 | 2791584 |
| SAMEA3879558 | PRJEB12449 | Illumina | 40 | Male   | 17.4 | underweight | USA | Colorectal Neoplasm | 2107348 | 1845219 |
| SAMEA3879559 | PRJEB12449 | Illumina | 66 | Male   | 21.6 | normal      | USA | Colorectal Neoplasm | 2250911 | 1970925 |
| SAMEA3879560 | PRJEB12449 | Illumina | 53 | Male   | 27.9 | pre-obesity | USA | Colorectal Neoplasm | 3483955 | 2755375 |
| SAMEA3879561 | PRJEB12449 | Illumina | 76 | Male   | 23.8 | normal      | USA | Health              | 3221465 | 2820753 |
| SAMEA3879562 | PRJEB12449 | Illumina | 67 | Male   | 33.2 | obesity     | USA | Colorectal Neoplasm | 3840958 | 3363189 |
| SAMEA3879563 | PRJEB12449 | Illumina | 54 | Female | 23.5 | normal      | USA | Colorectal Neoplasm | 4137726 | 3623043 |
| SAMEA3879564 | PRJEB12449 | Illumina | 51 | Male   | 24.8 | normal      | USA | Health              | 3649946 | 3195937 |
| SAMEA3879565 | PRJEB12449 | Illumina | 62 | Female | 20.7 | normal      | USA | Health              | 3130533 | 2741132 |
| SAMEA3879567 | PRJEB12449 | Illumina | 63 | Male   | 21.3 | normal      | USA | Colorectal Neoplasm | 3780951 | 3310646 |
| SAMEA3879568 | PRJEB12449 | Illumina | 47 | Male   | 24.4 | normal      | USA | Health              | 3739200 | 3274088 |
| SAMEA3879569 | PRJEB12449 | Illumina | 37 | Male   | 22.5 | normal      | USA | Colorectal Neoplasm | 4205669 | 3682534 |
| SAMEA3879570 | PRJEB12449 | Illumina | 68 | Male   | 23   | normal      | USA | Health              | 3379476 | 2959110 |
| SAMEA3879571 | PRJEB12449 | Illumina | 73 | Female | 23.9 | normal      | USA | Health              | 2687249 | 2352987 |
| SAMEA3879572 | PRJEB12449 | Illumina | 78 | Male   | 22.6 | normal      | USA | Colorectal Neoplasm | 4093767 | 3584552 |
| SAMEA3879573 | PRJEB12449 | Illumina | 71 | Male   | 24.7 | normal      | USA | Colorectal Neoplasm | 6415397 | 5617399 |
| SAMEA3879574 | PRJEB12449 | Illumina | 55 | Female | 23.8 | normal      | USA | Health              | 4242184 | 3714507 |
| SAMEA3879575 | PRJEB12449 | Illumina | 54 | Female | 24   | normal      | USA | Colorectal Neoplasm | 3211906 | 2812383 |
| SAMEA3879576 | PRJEB12449 | Illumina | 45 | Male   | 24.4 | normal      | USA | Health              | 3813484 | 3339132 |
| SAMEA3879577 | PRJEB12449 | Illumina | 60 | Male   | 23.1 | normal      | USA | Health              | 4076420 | 3569362 |
| SAMEA3879578 | PRJEB12449 | Illumina | 84 | Female | -99  | missing     | USA | Colorectal Neoplasm | 3475889 | 3043530 |
| SAMEA3879579 | PRJEB12449 | Illumina | 63 | Female | 16.8 | underweight | USA | Health              | 3480244 | 3047343 |
| SAMEA3879580 | PRJEB12449 | Illumina | 63 | Male   | 31.6 | obesity     | USA | Health              | 3824147 | 3348469 |
| SAMEA3879581 | PRJEB12449 | Illumina | 66 | Male   | 22.3 | normal      | USA | Colorectal Neoplasm | 2256501 | 1975819 |

|              |            |                |    |        |      |             |         |                     |          |          |
|--------------|------------|----------------|----|--------|------|-------------|---------|---------------------|----------|----------|
| SAMEA3879582 | PRJEB12449 | Illumina       | 66 | Female | 31.5 | obesity     | USA     | Colorectal Neoplasm | 2651086  | 2321323  |
| SAMEA3879583 | PRJEB12449 | Illumina       | 65 | Male   | 24.3 | normal      | USA     | Colorectal Neoplasm | 3153599  | 2761329  |
| SAMEA3879584 | PRJEB12449 | Illumina       | 71 | Male   | 27.8 | pre-obesity | USA     | Colorectal Neoplasm | 4638184  | 4061250  |
| SAMEA3879586 | PRJEB12449 | Illumina       | 72 | Female | 27.8 | pre-obesity | USA     | Colorectal Neoplasm | 3886726  | 3403264  |
| SAMEA3879587 | PRJEB12449 | Illumina       | 76 | Female | 22.1 | normal      | USA     | Health              | 3701605  | 3241170  |
| SAMEA3879588 | PRJEB12449 | Illumina       | 56 | Male   | 22.7 | normal      | USA     | Health              | 4362454  | 3819817  |
| SAMEA3879589 | PRJEB12449 | Illumina       | 70 | Female | 31.2 | obesity     | USA     | Health              | 3414784  | 2990026  |
| SAMEA3879591 | PRJEB12449 | Illumina       | 72 | Male   | 23.1 | normal      | USA     | Health              | 3646651  | 3193051  |
| SAMEA3879592 | PRJEB12449 | Illumina       | 42 | Male   | 27.6 | pre-obesity | USA     | Health              | 3722529  | 3259491  |
| SAMEA3879593 | PRJEB12449 | Illumina       | 76 | Female | 26.9 | pre-obesity | USA     | Health              | 3608488  | 3159635  |
| SAMEA3879594 | PRJEB12449 | Illumina       | 51 | Male   | 25.8 | pre-obesity | USA     | Colorectal Neoplasm | 3546100  | 3105008  |
| SAMEA3879595 | PRJEB12449 | Illumina       | 65 | Male   | 29.6 | pre-obesity | USA     | Health              | 6125052  | 5363169  |
| SAMEA3879596 | PRJEB12449 | Illumina       | 54 | Male   | 18.6 | normal      | USA     | Colorectal Neoplasm | 2626895  | 2300141  |
| SAMEA3879597 | PRJEB12449 | Illumina       | 57 | Male   | 26.4 | pre-obesity | USA     | Colorectal Neoplasm | 3674963  | 3217842  |
| SAMEA3879598 | PRJEB12449 | Illumina       | 70 | Female | 28.6 | pre-obesity | USA     | Health              | 3485928  | 3052320  |
| SAMEA3879599 | PRJEB12449 | Illumina       | 65 | Male   | 31.4 | obesity     | USA     | Colorectal Neoplasm | 7603241  | 6331293  |
| SAMEA3879600 | PRJEB12449 | Illumina       | 48 | Male   | 21.5 | normal      | USA     | Health              | 2467375  | 2160463  |
| SAMEA3879601 | PRJEB12449 | Illumina       | 56 | Male   | 25.8 | pre-obesity | USA     | Colorectal Neoplasm | 3960058  | 3467474  |
| SAMEA3879602 | PRJEB12449 | Illumina       | 71 | Male   | 22.6 | normal      | USA     | Colorectal Neoplasm | 3799504  | 3326891  |
| SAMEA3879603 | PRJEB12449 | Illumina       | 72 | Male   | 23.6 | normal      | USA     | Health              | 3315776  | 2903333  |
| SAMEA3879604 | PRJEB12449 | Illumina       | 64 | Female | 35.7 | obesity     | USA     | Colorectal Neoplasm | 2961475  | 2593103  |
| SAMEA3879606 | PRJEB12449 | Illumina       | 64 | Male   | 32.4 | obesity     | USA     | Health              | 2335931  | 2045369  |
| SAMEA3879607 | PRJEB12449 | Illumina       | 45 | Female | 22.6 | normal      | USA     | Health              | 4548304  | 3982550  |
| SAMEA3879608 | PRJEB12449 | Illumina       | 62 | Female | 25.8 | pre-obesity | USA     | Health              | 4056892  | 3352939  |
| SAMEA3879609 | PRJEB12449 | Illumina       | 84 | Male   | 23.5 | normal      | USA     | Colorectal Neoplasm | 3158372  | 2765508  |
| SAMEA4817893 | PRJEB27928 | Illumina HiSeq | 45 | Male   | 30.7 | obesity     | Germany | Health              | 35328522 | 29704759 |
| SAMEA4817894 | PRJEB27928 | Illumina HiSeq | 62 | Female | 28.5 | pre-obesity | Germany | Health              | 32372688 | 27771451 |
| SAMEA4817895 | PRJEB27928 | Illumina HiSeq | 74 | Male   | 22.9 | normal      | Germany | Health              | 31980982 | 27409550 |

|              |            |                |    |        |      |             |         |                     |          |          |
|--------------|------------|----------------|----|--------|------|-------------|---------|---------------------|----------|----------|
| SAMEA4817896 | PRJEB27928 | Illumina HiSeq | 59 | Female | 22.5 | normal      | Germany | Health              | 44202258 | 38128773 |
| SAMEA4817897 | PRJEB27928 | Illumina HiSeq | 59 | Female | 22.7 | normal      | Germany | Health              | 29803994 | 24975052 |
| SAMEA4817898 | PRJEB27928 | Illumina HiSeq | 62 | Female | 27   | pre-obesity | Germany | Health              | 31657626 | 25511690 |
| SAMEA4817899 | PRJEB27928 | Illumina HiSeq | 63 | Female | 25.8 | pre-obesity | Germany | Colorectal Neoplasm | 24257212 | 20196836 |
| SAMEA4817900 | PRJEB27928 | Illumina HiSeq | 85 | Female | 19.7 | normal      | Germany | Colorectal Neoplasm | 71084788 | 59617310 |
| SAMEA4817901 | PRJEB27928 | Illumina HiSeq | 80 | Male   | 28.4 | pre-obesity | Germany | Colorectal Neoplasm | 73512980 | 59653734 |
| SAMEA4817902 | PRJEB27928 | Illumina HiSeq | 50 | Female | 23.4 | normal      | Germany | Health              | 37692376 | 32105466 |
| SAMEA4817903 | PRJEB27928 | Illumina HiSeq | 61 | Male   | 29.9 | pre-obesity | Germany | Health              | 24446428 | 20709850 |
| SAMEA4817904 | PRJEB27928 | Illumina HiSeq | 59 | Female | 22.1 | normal      | Germany | Health              | 34000090 | 28251790 |
| SAMEA4817905 | PRJEB27928 | Illumina HiSeq | 50 | Male   | 21.6 | normal      | Germany | Health              | 32463278 | 27288101 |
| SAMEA4817906 | PRJEB27928 | Illumina HiSeq | 81 | Male   | 26.1 | pre-obesity | Germany | Colorectal Neoplasm | 87878462 | 71087905 |
| SAMEA4817907 | PRJEB27928 | Illumina HiSeq | 55 | Female | 18   | underweight | Germany | Health              | 46232444 | 39169828 |
| SAMEA4817908 | PRJEB27928 | Illumina HiSeq | 73 | Male   | 24.8 | normal      | Germany | Health              | 16998696 | 14526375 |
| SAMEA4817909 | PRJEB27928 | Illumina HiSeq | 45 | Male   | 22.1 | normal      | Germany | Health              | 30429798 | 25095845 |
| SAMEA4817910 | PRJEB27928 | Illumina HiSeq | 51 | Male   | 26.3 | pre-obesity | Germany | Health              | 39657070 | 33620881 |
| SAMEA4817911 | PRJEB27928 | Illumina HiSeq | 48 | Female | 25.4 | pre-obesity | Germany | Health              | 29973580 | 24194194 |
| SAMEA4817912 | PRJEB27928 | Illumina HiSeq | 64 | Male   | 26.8 | pre-obesity | Germany | Health              | 33172648 | 28043030 |
| SAMEA4817913 | PRJEB27928 | Illumina HiSeq | 75 | Male   | 21.5 | normal      | Germany | Health              | 35188422 | 29542668 |
| SAMEA4817914 | PRJEB27928 | Illumina HiSeq | 57 | Female | 22.2 | normal      | Germany | Health              | 28575282 | 24377458 |
| SAMEA4817915 | PRJEB27928 | Illumina HiSeq | 64 | Male   | 27.6 | pre-obesity | Germany | Health              | 42073490 | 36812858 |
| SAMEA4817916 | PRJEB27928 | Illumina HiSeq | 60 | Female | 25.8 | pre-obesity | Germany | Health              | 36484700 | 31632601 |
| SAMEA4817917 | PRJEB27928 | Illumina HiSeq | 61 | Male   | 25.2 | pre-obesity | Germany | Colorectal Neoplasm | 75850998 | 60062711 |
| SAMEA4817918 | PRJEB27928 | Illumina HiSeq | 29 | Female | 30.5 | obesity     | Germany | Health              | 39673116 | 33396461 |
| SAMEA4817919 | PRJEB27928 | Illumina HiSeq | 44 | Male   | 25.1 | pre-obesity | Germany | Health              | 39789898 | 33822531 |
| SAMEA4817920 | PRJEB27928 | Illumina HiSeq | 76 | Male   | 29.5 | pre-obesity | Germany | Health              | 24321294 | 20151206 |
| SAMEA4817921 | PRJEB27928 | Illumina HiSeq | 56 | Male   | 25   | normal      | Germany | Health              | 36559780 | 31611707 |
| SAMEA4817922 | PRJEB27928 | Illumina HiSeq | 53 | Male   | 18.5 | normal      | Germany | Health              | 37038222 | 31424279 |
| SAMEA4817923 | PRJEB27928 | Illumina HiSeq | 61 | Female | 25.4 | pre-obesity | Germany | Health              | 24204482 | 20005039 |

|              |            |                |    |        |      |             |         |                     |          |          |
|--------------|------------|----------------|----|--------|------|-------------|---------|---------------------|----------|----------|
| SAMEA4817924 | PRJEB27928 | Illumina HiSeq | 67 | Male   | 24.4 | normal      | Germany | Health              | 30085574 | 25065388 |
| SAMEA4817925 | PRJEB27928 | Illumina HiSeq | 67 | Female | 30.1 | obesity     | Germany | Colorectal Neoplasm | 38953346 | 33499123 |
| SAMEA4817926 | PRJEB27928 | Illumina HiSeq | 53 | Male   | 26.2 | pre-obesity | Germany | Health              | 27566448 | 22352084 |
| SAMEA4817927 | PRJEB27928 | Illumina HiSeq | 75 | Male   | 30.1 | obesity     | Germany | Health              | 31965288 | 26808666 |
| SAMEA4817928 | PRJEB27928 | Illumina HiSeq | 53 | Female | 24.1 | normal      | Germany | Health              | 39009100 | 34310190 |
| SAMEA4817929 | PRJEB27928 | Illumina HiSeq | 41 | Male   | 23.8 | normal      | Germany | Health              | 45450388 | 40151809 |
| SAMEA4817930 | PRJEB27928 | Illumina HiSeq | 61 | Male   | 21.6 | normal      | Germany | Colorectal Neoplasm | 76230418 | 55157585 |
| SAMEA4817931 | PRJEB27928 | Illumina HiSeq | 46 | Male   | 26.3 | pre-obesity | Germany | Health              | 28982188 | 23510308 |
| SAMEA4817932 | PRJEB27928 | Illumina HiSeq | 64 | Male   | 24.6 | normal      | Germany | Health              | 34040570 | 28485731 |
| SAMEA4817933 | PRJEB27928 | Illumina HiSeq | 63 | Female | 20.2 | normal      | Germany | Health              | 28728788 | 23172918 |
| SAMEA4817934 | PRJEB27928 | Illumina HiSeq | 75 | Male   | 22.9 | normal      | Germany | Health              | 19305674 | 15446861 |
| SAMEA4817935 | PRJEB27928 | Illumina HiSeq | 50 | Male   | 22.6 | normal      | Germany | Health              | 33411216 | 28846196 |
| SAMEA4817936 | PRJEB27928 | Illumina HiSeq | 65 | Male   | 32.7 | obesity     | Germany | Health              | 30283938 | 25039667 |
| SAMEA4817937 | PRJEB27928 | Illumina HiSeq | 79 | Male   | 22.4 | normal      | Germany | Colorectal Neoplasm | 83949212 | 69321231 |
| SAMEA4817938 | PRJEB27928 | Illumina HiSeq | 81 | Male   | 24   | normal      | Germany | Colorectal Neoplasm | 79561010 | 64837242 |
| SAMEA4817939 | PRJEB27928 | Illumina HiSeq | 61 | Male   | 27   | pre-obesity | Germany | Health              | 42411026 | 36617595 |
| SAMEA4817940 | PRJEB27928 | Illumina HiSeq | 75 | Female | 19.3 | normal      | Germany | Health              | 30313342 | 25884894 |
| SAMEA4817941 | PRJEB27928 | Illumina HiSeq | 57 | Female | 21.2 | normal      | Germany | Health              | 24152082 | 19789033 |
| SAMEA4817942 | PRJEB27928 | Illumina HiSeq | 66 | Male   | 30.3 | obesity     | Germany | Health              | 29511236 | 25564045 |
| SAMEA4817943 | PRJEB27928 | Illumina HiSeq | 64 | Male   | 25.4 | pre-obesity | Germany | Health              | 24757274 | 20306711 |
| SAMEA4817944 | PRJEB27928 | Illumina HiSeq | 61 | Female | 24.1 | normal      | Germany | Colorectal Neoplasm | 86094472 | 68980129 |
| SAMEA4817945 | PRJEB27928 | Illumina HiSeq | 63 | Female | 28.8 | pre-obesity | Germany | Colorectal Neoplasm | 73859064 | 57050414 |
| SAMEA4817946 | PRJEB27928 | Illumina HiSeq | 50 | Female | 32.1 | obesity     | Germany | Colorectal Neoplasm | 25338168 | 21971540 |
| SAMEA4817947 | PRJEB27928 | Illumina HiSeq | 64 | Female | 21.1 | normal      | Germany | Health              | 30592134 | 24571558 |
| SAMEA4817948 | PRJEB27928 | Illumina HiSeq | 73 | Male   | 24.5 | normal      | Germany | Health              | 43155400 | 36935129 |
| SAMEA4817949 | PRJEB27928 | Illumina HiSeq | 64 | Female | 22.8 | normal      | Germany | Health              | 18156390 | 16082962 |
| SAMEA4817950 | PRJEB27928 | Illumina HiSeq | 56 | Female | 30   | pre-obesity | Germany | Colorectal Neoplasm | 24639844 | 19650923 |
| SAMEA4817951 | PRJEB27928 | Illumina HiSeq | 60 | Female | 35.8 | obesity     | Germany | Colorectal Neoplasm | 69757052 | 54937599 |

|              |             |                     |    |        |       |             |         |                     |           |           |
|--------------|-------------|---------------------|----|--------|-------|-------------|---------|---------------------|-----------|-----------|
| SAMEA4817952 | PRJEB27928  | Illumina HiSeq      | 58 | Female | 23.8  | normal      | Germany | Health              | 29652838  | 23973418  |
| SAMEA4817953 | PRJEB27928  | Illumina HiSeq      | 60 | Male   | 19.7  | normal      | Germany | Colorectal Neoplasm | 66172000  | 48606194  |
| SAMEA4817954 | PRJEB27928  | Illumina HiSeq      | 57 | Female | 22.2  | normal      | Germany | Health              | 27015866  | 22542657  |
| SAMEA4817955 | PRJEB27928  | Illumina HiSeq      | 48 | Male   | 23    | normal      | Germany | Health              | 43574064  | 37422086  |
| SAMEA4817956 | PRJEB27928  | Illumina HiSeq      | 53 | Female | 23    | normal      | Germany | Health              | 18697980  | 16409709  |
| SAMEA4817957 | PRJEB27928  | Illumina HiSeq      | 62 | Female | 21.3  | normal      | Germany | Colorectal Neoplasm | 22336690  | 19012247  |
| SAMEA4817958 | PRJEB27928  | Illumina HiSeq      | 60 | Female | 23    | normal      | Germany | Health              | 33622044  | 28493005  |
| SAMEA4817959 | PRJEB27928  | Illumina HiSeq      | 60 | Female | 21.9  | normal      | Germany | Colorectal Neoplasm | 20089036  | 16717711  |
| SAMEA4817960 | PRJEB27928  | Illumina HiSeq      | 69 | Female | 25.3  | pre-obesity | Germany | Health              | 14962784  | 12404476  |
| SAMEA4817961 | PRJEB27928  | Illumina HiSeq      | 28 | Male   | 24.6  | normal      | Germany | Health              | 30744090  | 25214194  |
| SAMEA4817962 | PRJEB27928  | Illumina HiSeq      | 54 | Female | 24.6  | normal      | Germany | Health              | 40176314  | 32330166  |
| SAMEA4817963 | PRJEB27928  | Illumina HiSeq      | 52 | Male   | 29.9  | pre-obesity | Germany | Colorectal Neoplasm | 63635512  | 50731260  |
| SAMEA4817964 | PRJEB27928  | Illumina HiSeq      | 51 | Female | 25.6  | pre-obesity | Germany | Health              | 35665982  | 30839284  |
| SAMEA4817965 | PRJEB27928  | Illumina HiSeq      | 58 | Female | 27    | pre-obesity | Germany | Health              | 35421434  | 29685593  |
| SAMEA4817966 | PRJEB27928  | Illumina HiSeq      | 66 | Female | 13.3  | underweight | Germany | Colorectal Neoplasm | 67604768  | 54839936  |
| SAMEA4817967 | PRJEB27928  | Illumina HiSeq      | 45 | Female | 27.2  | pre-obesity | Germany | Health              | 49080544  | 41427919  |
| SAMEA4817968 | PRJEB27928  | Illumina HiSeq      | 84 | Male   | 24    | normal      | Germany | Colorectal Neoplasm | 42838792  | 33759068  |
| SAMEA4817969 | PRJEB27928  | Illumina HiSeq      | 73 | Male   | 26.6  | pre-obesity | Germany | Colorectal Neoplasm | 73996230  | 59634025  |
| SAMEA4817970 | PRJEB27928  | Illumina HiSeq      | 59 | Female | 32.3  | obesity     | Germany | Health              | 16082086  | 13780111  |
| SAMEA4817971 | PRJEB27928  | Illumina HiSeq      | 59 | Male   | 26.5  | pre-obesity | Germany | Colorectal Neoplasm | 78110758  | 63893298  |
| SAMEA4817972 | PRJEB27928  | Illumina HiSeq      | 37 | Male   | 24.5  | normal      | Germany | Health              | 46484902  | 40163524  |
| SAMEA4817973 | PRJEB27928  | Illumina HiSeq      | 39 | Male   | 24.9  | normal      | Germany | Health              | 38687540  | 33115837  |
| SAMEA4817974 | PRJEB27928  | Illumina HiSeq      | 70 | Male   | 26.7  | pre-obesity | Germany | Health              | 34304718  | 28246103  |
| SAMN07452475 | PRJNA397219 | Illumina HiSeq 2500 | 50 | Male   | 30.1  | obesity     | USA     | Colorectal Neoplasm | 115639160 | 109217840 |
| SAMN07452476 | PRJNA397219 | Illumina HiSeq 2500 | 83 | Female | 35.4  | obesity     | USA     | Colorectal Neoplasm | 121533416 | 120804068 |
| SAMN07452477 | PRJNA397219 | Illumina HiSeq 2500 | 59 | Male   | 25.89 | pre-obesity | USA     | Colorectal Neoplasm | 139637084 | 122969326 |
| SAMN07452478 | PRJNA397219 | Illumina HiSeq 2500 | 52 | Female | 23.58 | normal      | USA     | Colorectal Neoplasm | 117016184 | 91810132  |
| SAMN07452479 | PRJNA397219 | Illumina HiSeq 2500 | 63 | Male   | 21    | normal      | USA     | Colorectal Neoplasm | 120377184 | 111767694 |

|              |             |                     |    |        |       |             |     |                     |           |           |
|--------------|-------------|---------------------|----|--------|-------|-------------|-----|---------------------|-----------|-----------|
| SAMN07452480 | PRJNA397219 | Illumina HiSeq 2500 | 63 | Male   | 30.65 | obesity     | USA | Colorectal Neoplasm | 198688825 | 175064622 |
| SAMN07452481 | PRJNA397219 | Illumina HiSeq 2500 | 88 | Female | 31.98 | obesity     | USA | Colorectal Neoplasm | 174750876 | 152788792 |
| SAMN07452482 | PRJNA397219 | Illumina HiSeq 2500 | 64 | Male   | 22.2  | normal      | USA | Colorectal Neoplasm | 109459462 | 95844018  |
| SAMN07452483 | PRJNA397219 | Illumina HiSeq 2500 | 81 | Female | 22.15 | normal      | USA | Colorectal Neoplasm | 210717732 | 189607994 |
| SAMN07452484 | PRJNA397219 | Illumina HiSeq 2500 | 78 | Female | 24.9  | normal      | USA | Colorectal Neoplasm | 232026355 | 201962706 |
| SAMN07452486 | PRJNA397219 | Illumina HiSeq 2500 | 64 | Male   | 26.74 | pre-obesity | USA | Health              | 171395940 | 142967760 |
| SAMN07452487 | PRJNA397219 | Illumina HiSeq 2500 | 51 | Female | 22.54 | normal      | USA | Health              | 171688782 | 164527152 |
| SAMN07452488 | PRJNA397219 | Illumina HiSeq 2500 | 78 | Male   | 29.53 | pre-obesity | USA | Health              | 178557732 | 156347293 |
| SAMN07452489 | PRJNA397219 | Illumina HiSeq 2500 | 61 | Male   | 28.2  | pre-obesity | USA | Health              | 178436092 | 156240783 |
| SAMN07452490 | PRJNA397219 | Illumina HiSeq 2500 | 75 | Female | 25.4  | pre-obesity | USA | Health              | 171083060 | 149802380 |
| SAMN07452491 | PRJNA397219 | Illumina HiSeq 2500 | 59 | Male   | 24.46 | normal      | USA | Health              | 79479770  | 64266682  |
| SAMN07452492 | PRJNA397219 | Illumina HiSeq 2500 | 60 | Male   | 24.97 | normal      | USA | Health              | 175797242 | 153930175 |
| SAMN07452493 | PRJNA397219 | Illumina HiSeq 2500 | 74 | Female | 31.09 | obesity     | USA | Health              | 213780479 | 198184824 |
| SAMN07452494 | PRJNA397219 | Illumina HiSeq 2500 | 78 | Female | 28.78 | pre-obesity | USA | Health              | 223504154 | 201791922 |
| SAMN07452495 | PRJNA397219 | Illumina HiSeq 2500 | 55 | Male   | 27.04 | pre-obesity | USA | Health              | 153283438 | 124390471 |
| SAMN07452496 | PRJNA397219 | Illumina HiSeq 2500 | 76 | Female | 25.28 | pre-obesity | USA | Health              | 172379582 | 150937631 |

**Table S2** – p-value estimates for Wilcoxon rank sum test for sample Condition for all samples. p-values are for Shannon Index | Simpson Index | Species Richness

|        |                       |
|--------|-----------------------|
|        | Colorectal Neoplasm   |
| Normal | 0.45   0.9   0.00051* |

**Table S3** – p-value estimates for Wilcoxon rank sum test for Project ID for all samples. p-values are for Shannon Index | Simpson Index | Species Richness

|             |                                 |                             |                                   |                            |                          |                        |
|-------------|---------------------------------|-----------------------------|-----------------------------------|----------------------------|--------------------------|------------------------|
|             | PRJDB4176                       | PRJEB10878                  | PRJEB12449                        | PRJEB27928                 | PRJEB6070                | PRJEB7774              |
| PRJEB10878  | 0.02*   0.01*<br>  0.37         |                             |                                   |                            |                          |                        |
| PRJEB12449  | 0.07   0.12  <br>0.48           | 0.58   0.26  <br>0.69       |                                   |                            |                          |                        |
| PRJEB27928  | 0.01*   0.06  <br>0.11          | 0.95   0.53  <br>0.41       | 0.59   0.76  <br>0.20             |                            |                          |                        |
| PRJEB6070   | 1.5e-8*  <br>4.5e-9*   0.69     | 7.5e-4*  <br>3.5e-4*   0.41 | 8.2e-6*   2e-<br>7*   0.55        | 6.8e-4*  <br>5.4e-6   0.05 |                          |                        |
| PRJEB7774   | 8.2e-6*  <br>1.1e-6*  <br>0.01* | 0.01*   7e-3*<br>  2.6e-4*  | 9.6e-4*  <br>4.5e-5*  <br>5.4e-4* | 0.01*   4e-4*<br>  1.8e-4* | 0.66   0.66  <br>4.6e-4* |                        |
| PRJNA397219 | 0.4   0.26  <br>0.21            | 0.87   0.95  <br>0.41       | 0.95   0.58  <br>0.21             | 0.95   0.66  <br>0.48      | 0.05   0.09  <br>0.14    | 0.13   0.18  <br>0.03* |

**Table S4** – p-value estimates for Wilcoxon rank sum test for sample Sex for all samples. p-values are for Shannon Index | Simpson Index | Species Richness

|      |                    |
|------|--------------------|
|      | Female             |
| Male | 0.28   0.23   0.98 |

**Table S5** – p-value estimates for Wilcoxon rank sum test for sample Countries for all samples. p-values are for Shannon Index | Simpson Index | Species Richness

|         |                              |                             |                              |                             |                    |
|---------|------------------------------|-----------------------------|------------------------------|-----------------------------|--------------------|
|         | Austria                      | China                       | France                       | Germany                     | Japan              |
| China   | 0.01*   4.6e-3  <br>1.2e-4*  |                             |                              |                             |                    |
| France  | 0.36   0.37  <br>2.8e-3*     | 4.3e-4*   1.6e-4*<br>  0.24 |                              |                             |                    |
| Germany | 0.04*   3.7e-3*  <br>1.6e-5* | 0.36   0.78   0.48          | 1.1e-3*   5.7e-5*<br>  0.02* |                             |                    |
| Japan   | 4.3e-6*   8e-7*  <br>0.01*   | 0.01*   0.01*  <br>0.32     | 2.2e-8*   6.2e-9*<br>  0.99  | 4.3e-4*   1.4e-3*<br>  0.11 |                    |
| USA     | 4.5e-4*   5e-5*  <br>1.2e-4* | 0.41   0.28   0.99          | 4.3e-6*   2.3e-7*<br>  0.23  | 0.09   0.14   0.45          | 0.05   0.06   0.32 |

**Table S6** – p-value estimates for Wilcoxon rank sum test for sample Age for all samples. p-values are for Shannon Index | Simpson Index | Species Richness

|       | 25-30              | 31-50              | 51-70              |
|-------|--------------------|--------------------|--------------------|
| 31-50 | 0.05   0.09   0.12 |                    |                    |
| 51-70 | 0.05   0.09   0.06 | 0.96   0.88   0.06 |                    |
| 70+   | 0.05   0.09   0.06 | 0.82   0.63   0.13 | 0.82   0.63   0.66 |

**Table S7** – p-value estimates for Wilcoxon rank sum test for sample BMI for all samples. p-values are for Shannon Index | Simpson Index | Species Richness

|             | Underweight        | Normal             | Pre-obesity        |
|-------------|--------------------|--------------------|--------------------|
| Normal      | 0.95   0.93   0.67 |                    |                    |
| Pre-obesity | 0.95   0.93   0.67 | 0.95   0.93   0.67 |                    |
| Obesity     | 0.95   0.93   0.67 | 0.95   0.93   0.67 | 0.95   0.96   0.67 |

**Table S8** – p-value estimates for two-sided Wilcoxon rank sum test for Sample Condition blocked by each Confounder. p-values are for Shannon Index | Simpson Index | Species Richness

| Normal | Colorectal Neoplasm |                       |  |
|--------|---------------------|-----------------------|--|
|        | Project ID          | 0.55   0.8   4e-4*    |  |
|        | Sex                 | 0.78   0.67   5.2e-4* |  |
|        | Country             | 0.21   0.54   1.7e-3* |  |
|        | Age                 | 0.42   0.92   2.9e-4* |  |
|        | BMI                 | 0.48   0.94   4.7e-4* |  |

**Table S9** – Differential Abundance Analysis results from DESeq2 for species with significant Differential Abundance (Figure 1C). Blue lines represent species significantly more abundant in Normal samples and red lines represent species significantly more abundant in CRC samples. Species were kept based on p-value < 0.05 and |LFC| > 0.5.

| OTU     | baseMean | log2FoldChange | padj     | Kingdom  | Phylum         | Class               | Order              | Family              | Genus                         | Species                       |
|---------|----------|----------------|----------|----------|----------------|---------------------|--------------------|---------------------|-------------------------------|-------------------------------|
| 1686    | 29312.86 | -1.62981       | 6.44E-07 | Bacteria | Actinobacteria | Actinomycetia       | Bifidobacteriales  | Bifidobacteriaceae  | <i>Bifidobacterium</i>        | <i>catenulatum</i>            |
| 1308    | 28403.91 | -1.38665       | 7.00E-08 | Bacteria | Firmicutes     | Bacilli             | Lactobacillales    | Streptococcaceae    | <i>Streptococcus</i>          | <i>thermophilus</i>           |
| 1681    | 24499.76 | -1.02278       | 0.027675 | Bacteria | Actinobacteria | Actinomycetia       | Bifidobacteriales  | Bifidobacteriaceae  | <i>Bifidobacterium</i>        | <i>bifidum</i>                |
| 1547    | 69963.99 | -0.98823       | 8.36E-05 | Bacteria | Firmicutes     | Erysipelotrichia    | Erysipelotrichales | Erysipelotrichaceae | <i>Erysipelatoclostridium</i> | <i>ramosum</i>                |
| 2877527 | 16124.26 | -0.95618       | 0.007657 | Bacteria | Firmicutes     | Clostridia          | Eubacteriales      | Lachnospiraceae     | <i>Blautia</i>                | <i>sp. NBRC 113351</i>        |
| 1680    | 114556.7 | -0.93123       | 0.000528 | Bacteria | Actinobacteria | Actinomycetia       | Bifidobacteriales  | Bifidobacteriaceae  | <i>Bifidobacterium</i>        | <i>adolescentis</i>           |
| 216816  | 128873.5 | -0.92178       | 4.23E-05 | Bacteria | Actinobacteria | Actinomycetia       | Bifidobacteriales  | Bifidobacteriaceae  | <i>Bifidobacterium</i>        | <i>longum</i>                 |
| 1796635 | 13657.48 | -0.83586       | 0.001185 | Bacteria | Firmicutes     | Erysipelotrichia    | Erysipelotrichales | Erysipelotrichaceae | <i>Longicatena</i>            | <i>caecimuris</i>             |
| 28026   | 68482.93 | -0.66939       | 0.020214 | Bacteria | Actinobacteria | Actinomycetia       | Bifidobacteriales  | Bifidobacteriaceae  | <i>Bifidobacterium</i>        | <i>pseudocatenulatum</i>      |
| 1982626 | 24697.19 | -0.53031       | 0.048807 | Bacteria | Firmicutes     | Erysipelotrichia    | Erysipelotrichales | Erysipelotrichaceae | <i>Faecalibacillus</i>        | <i>intestinalis</i>           |
| 649756  | 337210.1 | -0.52755       | 0.002889 | Bacteria | Firmicutes     | Clostridia          | Eubacteriales      | Lachnospiraceae     | <i>Anaerostipes</i>           | <i>hadrus</i>                 |
| 2755405 | 17344.1  | 0.544064       | 0.032424 | Bacteria | Bacteroidetes  | Bacteroidia         | Bacteroidales      | Bacteroidaceae      | <i>Bacteroides</i>            | <i>sp. CACC 737</i>           |
| 823     | 259954.9 | 0.556382       | 0.002877 | Bacteria | Bacteroidetes  | Bacteroidia         | Bacteroidales      | Tannerellaceae      | <i>Parabacteroides</i>        | <i>distasonis</i>             |
| 2785531 | 50853.49 | 0.573694       | 0.022899 | Bacteria | Bacteroidetes  | Bacteroidia         | Bacteroidales      | Bacteroidaceae      | <i>Bacteroides</i>            | <i>sp. HF-162</i>             |
| 1288121 | 2819.22  | 0.591219       | 0.005354 | Bacteria | Bacteroidetes  | Bacteroidia         | Bacteroidales      | Rikenellaceae       | <i>Alistipes</i>              | <i>senegalensis</i>           |
| 2585118 | 15036.55 | 0.593978       | 0.002963 | Bacteria | Bacteroidetes  | Bacteroidia         | Bacteroidales      | Rikenellaceae       | <i>Alistipes</i>              | <i>communis</i>               |
| 33038   | 353181.2 | 0.595809       | 0.006853 | Bacteria | Firmicutes     | Clostridia          | Eubacteriales      | Lachnospiraceae     | <i>Mediterraneibacter</i>     | <i>[Ruminococcus] gnavus</i>  |
| 820     | 679812.9 | 0.609191       | 0.000869 | Bacteria | Bacteroidetes  | Bacteroidia         | Bacteroidales      | Bacteroidaceae      | <i>Bacteroides</i>            | <i>uniformis</i>              |
| 2650157 | 24120.58 | 0.643482       | 0.017862 | Bacteria | Bacteroidetes  | Bacteroidia         | Bacteroidales      | Bacteroidaceae      | <i>Bacteroides</i>            | <i>zhangwenhongii</i>         |
| 562     | 977063.4 | 0.665268       | 0.032424 | Bacteria | Proteobacteria | Gammaproteobacteria | Enterobacteriales  | Enterobacteriaceae  | <i>Escherichia</i>            | <i>coli</i>                   |
| 1522    | 27688.09 | 0.76706        | 6.07E-05 | Bacteria | Firmicutes     | Erysipelotrichia    | Erysipelotrichales | Erysipelotrichaceae | <i>Erysipelatoclostridium</i> | <i>[Clostridium] innocuum</i> |
| 411486  | 9497.538 | 0.794251       | 9.32E-09 | Bacteria | Firmicutes     | Clostridia          | Eubacteriales      | Clostridiaceae      | <i>Clostridium</i>            | <i>sp. M62/1</i>              |
| 84112   | 20868.68 | 0.833712       | 0.000109 | Bacteria | Actinobacteria | Coriobacteriia      | Eggerthellales     | Eggerthellaceae     | <i>Eggerthella</i>            | <i>lenta</i>                  |
| 328814  | 29889.5  | 0.854798       | 3.04E-05 | Bacteria | Bacteroidetes  | Bacteroidia         | Bacteroidales      | Rikenellaceae       | <i>Alistipes</i>              | <i>shahii</i>                 |
| 2528203 | 27892.4  | 0.882159       | 0.000398 | Bacteria | Bacteroidetes  | Bacteroidia         | Bacteroidales      | Bacteroidaceae      | <i>Bacteroides</i>            | <i>sp. A1C1</i>               |
| 821     | 1672156  | 0.913364       | 4.32E-06 | Bacteria | Bacteroidetes  | Bacteroidia         | Bacteroidales      | Bacteroidaceae      | <i>Phocaecicola</i>           | <i>vulgatus</i>               |
| 2763056 | 2894.965 | 0.945701       | 4.44E-10 | Bacteria | Firmicutes     | Clostridia          | Eubacteriales      | Oscillospiraceae    | <i>Oscillibacter</i>          | <i>sp. NSJ-62</i>             |
| 39483   | 10886.83 | 0.983163       | 4.74E-08 | Bacteria | Firmicutes     | Erysipelotrichia    | Erysipelotrichales | Erysipelotrichaceae | <i>Faecalitalea</i>           | <i>cylindroides</i>           |
| 357276  | 400739.9 | 0.987497       | 1.98E-07 | Bacteria | Bacteroidetes  | Bacteroidia         | Bacteroidales      | Bacteroidaceae      | <i>Phocaecicola</i>           | <i>dorei</i>                  |
| 292800  | 80002.68 | 1.001485       | 1.81E-07 | Bacteria | Firmicutes     | Clostridia          | Eubacteriales      | Oscillospiraceae    | <i>Flavonifractor</i>         | <i>plautii</i>                |
| 901     | 2697.457 | 1.001758       | 0.019249 | Bacteria | Proteobacteria | Deltaproteobacteria | Desulfovibrionales | Desulfovibrionaceae | <i>Desulfovibrio</i>          | <i>piger</i>                  |

|         |          |          |          |          |                 |                  |                    |                     |                                                          |                               |
|---------|----------|----------|----------|----------|-----------------|------------------|--------------------|---------------------|----------------------------------------------------------|-------------------------------|
| 2764325 | 4979.06  | 1.01141  | 1.80E-08 | Bacteria | Firmicutes      | Clostridia       | Eubacteriales      | Eubacteriaceae      | <i>Eubacterium</i>                                       | <i>sp. NSJ-61</i>             |
| 674529  | 24018.2  | 1.02721  | 0.000243 | Bacteria | Bacteroidetes   | Bacteroidia      | Bacteroidales      | Bacteroidaceae      | <i>Bacteroides</i>                                       | <i>faecis</i>                 |
| 1981510 | 7140.955 | 1.042005 | 0.021421 | Bacteria | Firmicutes      | Clostridia       | Eubacteriales      | Oscillospiraceae    | <i>Monoglobus</i>                                        | <i>pectinilyticus</i>         |
| 2093857 | 8420.058 | 1.051182 | 4.39E-12 | Bacteria | Firmicutes      | Clostridia       | Eubacteriales      | Oscillospiraceae    | <i>Dysosmobacter</i>                                     | <i>welbionis</i>              |
| 2714355 | 25828.24 | 1.10664  | 5.05E-11 | Bacteria | Firmicutes      | Clostridia       | Eubacteriales      | Oscillospiraceae    | <i>Vescimonas</i>                                        | <i>coprocola</i>              |
| 818     | 356700.5 | 1.112719 | 2.36E-08 | Bacteria | Bacteroidetes   | Bacteroidia      | Bacteroidales      | Bacteroidaceae      | <i>Bacteroides</i>                                       | <i>thetaitaomicon</i>         |
| 328812  | 14763.54 | 1.113306 | 3.46E-05 | Bacteria | Bacteroidetes   | Bacteroidia      | Bacteroidales      | Tannerellaceae      | <i>Parabacteroides</i>                                   | <i>goldsteinii</i>            |
| 291644  | 20523.69 | 1.113732 | 4.75E-05 | Bacteria | Bacteroidetes   | Bacteroidia      | Bacteroidales      | Bacteroidaceae      | <i>Bacteroides</i>                                       | <i>salyersiae</i>             |
| 2780922 | 3285.962 | 1.145904 | 1.13E-07 | Bacteria | Firmicutes      | Clostridia       | Eubacteriales      | Oscillospiraceae    | <i>Solibaculum</i>                                       | <i>mannosilyticum</i>         |
| 2714358 | 7227.484 | 1.146213 | 2.21E-12 | Bacteria | Firmicutes      | Clostridia       | Eubacteriales      | Oscillospiraceae    | <i>Pusillimonas</i> (ex<br><i>Kitahara et al. 2021</i> ) | <i>Pusillimonas faecalis</i>  |
| 2714353 | 7624.789 | 1.14987  | 6.96E-13 | Bacteria | Firmicutes      | Clostridia       | Eubacteriales      | Oscillospiraceae    | <i>Vescimonas</i>                                        | <i>fastidiosa</i>             |
| 371601  | 285466   | 1.226974 | 5.05E-11 | Bacteria | Bacteroidetes   | Bacteroidia      | Bacteroidales      | Bacteroidaceae      | <i>Bacteroides</i>                                       | <i>xylanisolvans</i>          |
| 544645  | 9750.41  | 1.263071 | 9.32E-09 | Bacteria | Bacteroidetes   | Bacteroidia      | Bacteroidales      | Odoribacteraceae    | <i>Butyricimonas</i>                                     | <i>virosa</i>                 |
| 246787  | 188447.4 | 1.268124 | 2.63E-08 | Bacteria | Bacteroidetes   | Bacteroidia      | Bacteroidales      | Bacteroidaceae      | <i>Bacteroides</i>                                       | <i>cellulosilyticus</i>       |
| 28118   | 33057.38 | 1.355955 | 8.38E-13 | Bacteria | Bacteroidetes   | Bacteroidia      | Bacteroidales      | Odoribacteraceae    | <i>Odoribacter</i>                                       | <i>splanchnicus</i>           |
| 208479  | 156248.1 | 1.364719 | 2.05E-10 | Bacteria | Firmicutes      | Clostridia       | Eubacteriales      | Lachnospiraceae     | <i>Enterocloster</i>                                     | <i>bolteae</i>                |
| 2086584 | 2403.594 | 1.382652 | 1.31E-12 | Bacteria | Firmicutes      | Clostridia       | Eubacteriales      | Clostridiaceae      | <i>Massilistercora</i>                                   | <i>timonensis</i>             |
| 626932  | 3666.227 | 1.419563 | 1.38E-06 | Bacteria | Bacteroidetes   | Bacteroidia      | Bacteroidales      | Rikenellaceae       | <i>Alistipes</i>                                         | <i>indistinctus</i>           |
| 29347   | 20963.41 | 1.442922 | 1.06E-13 | Bacteria | Firmicutes      | Clostridia       | Eubacteriales      | Lachnospiraceae     | <i>Lachnoclostridium</i>                                 | <i>[Clostridium] scindens</i> |
| 1550024 | 49195.26 | 1.450459 | 1.01E-16 | Bacteria | Firmicutes      | Clostridia       | Eubacteriales      | Oscillospiraceae    | <i>Ruthenibacterium</i>                                  | <i>lactatiformans</i>         |
| 2025876 | 26713.73 | 1.530571 | 0.001233 | Bacteria | Bacteroidetes   | Bacteroidia      | Bacteroidales      | Tannerellaceae      | <i>Parabacteroides</i>                                   | <i>sp. CT06</i>               |
| 1297617 | 5742.032 | 1.605096 | 9.68E-22 | Bacteria | Firmicutes      | Clostridia       | Eubacteriales      | Clostridiaceae      | <i>Intestinimonas</i>                                    | <i>butyriciproducens</i>      |
| 47678   | 139795.3 | 1.68215  | 1.13E-17 | Bacteria | Bacteroidetes   | Bacteroidia      | Bacteroidales      | Bacteroidaceae      | <i>Bacteroides</i>                                       | <i>caccae</i>                 |
| 214856  | 38943.1  | 1.715154 | 3.80E-13 | Bacteria | Bacteroidetes   | Bacteroidia      | Bacteroidales      | Rikenellaceae       | <i>Alistipes</i>                                         | <i>finegoldii</i>             |
| 328813  | 120758.4 | 1.719674 | 1.73E-14 | Bacteria | Bacteroidetes   | Bacteroidia      | Bacteroidales      | Rikenellaceae       | <i>Alistipes</i>                                         | <i>onderdonkii</i>            |
| 817     | 540123.3 | 1.922809 | 4.11E-23 | Bacteria | Bacteroidetes   | Bacteroidia      | Bacteroidales      | Bacteroidaceae      | <i>Bacteroides</i>                                       | <i>fragilis</i>               |
| 291645  | 20886.09 | 2.469943 | 2.82E-17 | Bacteria | Bacteroidetes   | Bacteroidia      | Bacteroidales      | Bacteroidaceae      | <i>Bacteroides</i>                                       | <i>nordii</i>                 |
| 239935  | 507069.9 | 2.506717 | 3.93E-20 | Bacteria | Verrucomicrobia | Verrucomicrobiae | Verrucomicrobiales | Akkermansiaceae     | <i>Akkermansia</i>                                       | <i>muciniphila</i>            |
| 2173    | 40034.79 | 2.7268   | 4.43E-11 | Archaea  | Euryarchaeota   | Methanobacteria  | Methanobacteriales | Methanobacteriaceae | <i>Methanobrevibacter</i>                                | <i>smithii</i>                |
| 28131   | 4987.349 | 4.4619   | 1.94E-21 | Bacteria | Bacteroidetes   | Bacteroidia      | Bacteroidales      | Prevotellaceae      | <i>Prevotella</i>                                        | <i>intermedia</i>             |
| 33033   | 9061.284 | 4.806374 | 2.79E-54 | Bacteria | Firmicutes      | Tissierellia     | Tissierellales     | Peptoniphilaceae    | <i>Parvimonas</i>                                        | <i>micra</i>                  |
| 29391   | 2278.941 | 5.00482  | 7.88E-45 | Bacteria | Firmicutes      | Bacilli          | Bacillales         |                     | <i>Gemella</i>                                           | <i>morbillosum</i>            |
| 851     | 4103.118 | 5.033698 | 7.40E-37 | Bacteria | Fusobacteria    | Fusobacteriia    | Fusobacteriales    | Fusobacteriaceae    | <i>Fusobacterium</i>                                     | <i>nucleatum</i>              |
| 28123   | 1806.634 | 6.417803 | 4.02E-23 | Bacteria | Bacteroidetes   | Bacteroidia      | Bacteroidales      | Porphyromonadaceae  | <i>Porphyromonas</i>                                     | <i>asaccharolytica</i>        |

**Table S10** – Differentially abundant taxa in each project. Values indicate LFC(p-value). Species in grey line were observed in 3 or more projects and kept for posterior analyses.

| Taxa                                                 | PRJDB4176            | PRJEB10878            | PRJEB12449            | PRJEB27928           | PRJEB6070            | PRJEB7774            | PRJNA397219         | Total    |
|------------------------------------------------------|----------------------|-----------------------|-----------------------|----------------------|----------------------|----------------------|---------------------|----------|
| <i>Acidaminococcus intestini</i>                     | NA                   | NA                    | NA                    | NA                   | NA                   | 2.93 (0.0307)        | NA                  | 1        |
| <i>Akkermansia muciniphila</i>                       | 3.71 (9e-04)         | NA                    | NA                    | NA                   | 1.52 (0.0121)        | NA                   | NA                  | 2        |
| <b><i>Alistipes onderdonkii</i></b>                  | <b>2.24 (0.0037)</b> | NA                    | NA                    | <b>1.54 (0.0193)</b> | <b>1.48 (0.0031)</b> | NA                   | NA                  | <b>3</b> |
| <i>Alistipes senegalensis</i>                        | NA                   | NA                    | 1.51 (0.0049)         | NA                   | NA                   | NA                   | NA                  | 1        |
| <i>Anaerobutyricum hallii</i>                        | NA                   | NA                    | NA                    | -0.91 (0.0382)       | NA                   | NA                   | NA                  | 1        |
| <i>Anaerostipes hadrus</i>                           | NA                   | NA                    | NA                    | NA                   | NA                   | -1.24 (5e-04)        | NA                  | 1        |
| <b><i>Bacteroides caccae</i></b>                     | NA                   | <b>1.56 (0.0021)</b>  | <b>1.42 (0.0076)</b>  | <b>1.28 (0.0255)</b> | NA                   | <b>1.73 (5e-04)</b>  | NA                  | <b>4</b> |
| <i>Bacteroides cellulosilyticus</i>                  | NA                   | NA                    | NA                    | NA                   | 1.12 (0.0334)        | NA                   | NA                  | 1        |
| <i>Bacteroides eggerthii</i>                         | NA                   | NA                    | NA                    | NA                   | NA                   | 1.44 (0.033)         | NA                  | 1        |
| <i>Bacteroides faecis</i>                            | NA                   | NA                    | NA                    | NA                   | NA                   | NA                   | 5.04 (3e-04)        | 1        |
| <b><i>Bacteroides fragilis</i></b>                   | NA                   | NA                    | NA                    | <b>1.83 (0.0028)</b> | <b>1.14 (0.0016)</b> | NA                   | <b>3.24 (5e-04)</b> | <b>3</b> |
| <b><i>Bacteroides nordii</i></b>                     | NA                   | NA                    | NA                    | <b>3.14 (8e-04)</b>  | <b>2.21 (7e-04)</b>  | <b>2.88 (5e-04)</b>  | NA                  | <b>3</b> |
| <i>Bacteroides ovatus</i>                            | NA                   | NA                    | NA                    | NA                   | NA                   | 1.39 (0.0037)        | NA                  | 1        |
| <i>Bacteroides salyersiae</i>                        | NA                   | NA                    | NA                    | NA                   | 2.21 (1e-04)         | NA                   | 4.51 (0.0085)       | 2        |
| <i>Bacteroides stercoris</i>                         | NA                   | NA                    | NA                    | NA                   | NA                   | 1.27 (0.0315)        | NA                  | 1        |
| <b><i>Bacteroides thetaiotaomicron</i></b>           | NA                   | <b>0.93 (0.0404)</b>  | <b>1.79 (0.0017)</b>  | <b>1.41 (0.0153)</b> | NA                   | NA                   | NA                  | <b>3</b> |
| <i>Bacteroides uniformis</i>                         | NA                   | NA                    | NA                    | NA                   | 0.73 (0.018)         | 0.85 (0.0382)        | NA                  | 2        |
| <i>Bacteroides xylanisolvens</i>                     | -1.6 (9e-04)         | NA                    | NA                    | 1.65 (8e-04)         | NA                   | 1.22 (0.0035)        | NA                  | 3        |
| <i>Bifidobacterium adolescentis</i>                  | NA                   | NA                    | NA                    | NA                   | NA                   | -1.34 (0.0119)       | NA                  | 1        |
| <i>Bifidobacterium catenulatum</i>                   | NA                   | NA                    | NA                    | NA                   | -1.68 (0.0334)       | NA                   | NA                  | 1        |
| <i>Bifidobacterium longum</i>                        | NA                   | NA                    | NA                    | NA                   | NA                   | -1.4 (5e-04)         | NA                  | 1        |
| <i>Bifidobacterium pseudocatenulatum</i>             | NA                   | NA                    | NA                    | NA                   | NA                   | -1.54 (0.0217)       | NA                  | 1        |
| <i>Blautia obeum</i>                                 | NA                   | NA                    | 0.83 (0.0446)         | NA                   | NA                   | NA                   | NA                  | 1        |
| <i>Blautia</i> sp. NBRC 113351                       | NA                   | NA                    | NA                    | NA                   | -2.82 (1e-04)        | -1.77 (0.0207)       | NA                  | 2        |
| <i>Blautia</i> sp. SC05B48                           | NA                   | NA                    | NA                    | NA                   | NA                   | -0.6 (0.0187)        | NA                  | 1        |
| <i>Butyrivibrio fibriosus</i>                        | NA                   | NA                    | NA                    | 1.42 (0.0362)        | NA                   | NA                   | NA                  | 1        |
| <i>Clostridioides difficile</i>                      | NA                   | NA                    | NA                    | NA                   | NA                   | -0.58 (0.0315)       | NA                  | 1        |
| <i>Clostridium</i> sp. M62/1                         | NA                   | NA                    | 1.4 (0.0076)          | NA                   | NA                   | NA                   | NA                  | 1        |
| <i>Collinsella aerofaciens</i>                       | NA                   | NA                    | NA                    | 1.39 (0.0331)        | NA                   | NA                   | NA                  | 1        |
| <i>Coprococcus comes</i>                             | NA                   | NA                    | 0.96 (0.0382)         | NA                   | -0.72 (0.0166)       | NA                   | NA                  | 2        |
| <b><i>Coprococcus eutactus</i></b>                   | NA                   | <b>-1.07 (0.0031)</b> | NA                    | <b>-2.28 (8e-04)</b> | <b>-1.11 (2e-04)</b> | <b>-1.41 (6e-04)</b> | NA                  | <b>4</b> |
| <i>Coprococcus</i> sp. ART55/1                       | 1.62 (0.0262)        | -2.01 (9e-04)         | NA                    | NA                   | -1.44 (0.0031)       | NA                   | NA                  | 3        |
| <i>Desulfovibrio piger</i>                           | NA                   | NA                    | NA                    | NA                   | NA                   | NA                   | -9.53 (1e-04)       | 1        |
| <i>Dysosmobacter welbionis</i>                       | NA                   | NA                    | 0.98 (0.0382)         | NA                   | 0.87 (0.0014)        | NA                   | NA                  | 2        |
| <i>Eggerthella lenta</i>                             | NA                   | NA                    | 1.91 (0.0029)         | 1.39 (0.0177)        | NA                   | NA                   | NA                  | 2        |
| <b><i>Enterocloster bolteae</i></b>                  | NA                   | <b>1.47 (8e-04)</b>   | <b>1.65 (0.0076)</b>  | <b>1.47 (6e-04)</b>  | NA                   | NA                   | NA                  | <b>3</b> |
| <i>Enterocloster clostridioformis</i>                | -2.48 (0.0017)       | NA                    | NA                    | 1.49 (0.0062)        | 0.9 (0.0334)         | NA                   | NA                  | 3        |
| <i>Enterococcus faecium</i>                          | -2.04 (0.0024)       | NA                    | NA                    | NA                   | NA                   | NA                   | NA                  | 1        |
| <i>Erysipelatoclostridium</i> [Clostridium] innocuum | NA                   | NA                    | 1.5 (0.0076)          | 1.26 (0.003)         | NA                   | -0.71 (0.047)        | NA                  | 3        |
| <b><i>Erysipelatoclostridium ramosum</i></b>         | <b>-2.27 (9e-04)</b> | <b>NA</b>             | <b>-2.14 (0.0057)</b> | <b>2.18 (6e-04)</b>  | <b>NA</b>            | <b>-1.6 (0.006)</b>  | <b>NA</b>           | <b>4</b> |
| <i>Escherichia coli</i>                              | NA                   | NA                    | NA                    | -2.74 (0.0177)       | NA                   | NA                   | NA                  | 1        |
| <i>Eubacterium</i> sp. NSJ-61                        | NA                   | NA                    | NA                    | NA                   | NA                   | 1.11 (0.0058)        | NA                  | 1        |
| <i>Faecalibacillus intestinalis</i>                  | NA                   | -1.52 (0.0186)        | NA                    | NA                   | NA                   | NA                   | NA                  | 1        |
| <i>Faecalitalea cylindroides</i>                     | 1.88 (0.0074)        | NA                    | NA                    | -1.28 (0.0022)       | 0.89 (0.0129)        | -0.52 (0.049)        | NA                  | 4        |
| <i>Flavonifractor plautii</i>                        | NA                   | 0.91 (0.0404)         | NA                    | NA                   | NA                   | NA                   | NA                  | 1        |
| <i>Fusobacterium nucleatum</i>                       | NA                   | NA                    | NA                    | NA                   | NA                   | 2.56 (0.0382)        | NA                  | 1        |
| <i>Gemella morbillorum</i>                           | 2.64 (0.0014)        | NA                    | NA                    | NA                   | NA                   | 2.39 (0.0098)        | NA                  | 2        |
| <i>Haemophilus parainfluenzae</i>                    | NA                   | -2.07 (7e-04)         | NA                    | NA                   | NA                   | NA                   | NA                  | 1        |
| <i>Intestinimonas butyrificiproducens</i>            | 1.33 (0.0382)        | NA                    | NA                    | NA                   | NA                   | NA                   | NA                  | 1        |
| <i>Lachnospira eligens</i>                           | NA                   | -1.48 (0.0034)        | NA                    | NA                   | -0.95 (0.0121)       | 0.95 (0.0127)        | NA                  | 3        |
| <i>Longibaculum</i> sp. KGMB06250                    | NA                   | NA                    | NA                    | NA                   | -1.02 (0.0264)       | NA                   | NA                  | 1        |
| <i>Longicatena caecimuris</i>                        | NA                   | NA                    | NA                    | NA                   | -1.2 (0.0334)        | NA                   | NA                  | 1        |

|                                                  |                      |           |                |                |                     |                      |                |          |
|--------------------------------------------------|----------------------|-----------|----------------|----------------|---------------------|----------------------|----------------|----------|
| <i>Massilistercora timonensis</i>                | NA                   | NA        | 1.36 (0.0114)  | 1.19 (0.0278)  | NA                  | NA                   | NA             | 2        |
| <i>Mediterraneibacter [Ruminococcus] gnavus</i>  | NA                   | NA        | NA             | 1.59 (0.0043)  | NA                  | NA                   | NA             | 1        |
| <i>Mediterraneibacter [Ruminococcus] torques</i> | NA                   | NA        | 1.54 (0.0014)  | NA             | -0.74 (0.0264)      | NA                   | NA             | 2        |
| <i>Methanobrevibacter smithii</i>                | NA                   | NA        | 2.7 (0.0144)   | NA             | NA                  | 1.88 (0.0315)        | NA             | 2        |
| <i>Oscillibacter sp. NSJ-62</i>                  | NA                   | NA        | NA             | NA             | 0.95 (2e-04)        | NA                   | NA             | 1        |
| <i>Parabacteroides distasonis</i>                | NA                   | NA        | NA             | NA             | NA                  | 1.44 (0.0019)        | NA             | 1        |
| <i>Parabacteroides johnsonii</i>                 | NA                   | NA        | -2.13 (0.0029) | NA             | NA                  | NA                   | NA             | 1        |
| <i>Parabacteroides merdae</i>                    | NA                   | NA        | NA             | NA             | 0.95 (0.0129)       | NA                   | NA             | 1        |
| <i>Paraprevotella xylaniphila</i>                | NA                   | NA        | -2.5 (0.0029)  | NA             | NA                  | NA                   | NA             | 1        |
| <i>Phascolarctobacterium faecium</i>             | NA                   | NA        | NA             | 4.08 (0.0011)  | NA                  | NA                   | NA             | 1        |
| <i>Phocaeicola dorei</i>                         | -1.38 (0.0262)       | NA        | NA             | NA             | 0.86 (0.0464)       | NA                   | NA             | 2        |
| <i>Phocaeicola vulgatus</i>                      | NA                   | NA        | NA             | NA             | NA                  | 1.56 (2e-04)         | NA             | 1        |
| <i>Prevotella copri</i>                          | NA                   | NA        | NA             | NA             | NA                  | NA                   | -8.19 (0.0022) | 1        |
| <b><i>Prevotella intermedia</i></b>              | <b>2.95 (0.0401)</b> | <b>NA</b> | <b>NA</b>      | <b>NA</b>      | <b>2.7 (0.0334)</b> | <b>3.52 (0.0046)</b> | <b>NA</b>      | <b>3</b> |
| <i>Pseudomonas aeruginosa</i>                    | NA                   | NA        | NA             | NA             | NA                  | NA                   | 4 (3e-04)      | 1        |
| <i>Roseburia intestinalis</i>                    | NA                   | NA        | 1.39 (0.0029)  | -1.03 (0.0382) | NA                  | NA                   | NA             | 2        |
| <i>Ruthenibacterium lactatiformans</i>           | NA                   | NA        | NA             | 1.7 (6e-04)    | NA                  | NA                   | NA             | 1        |
| <i>Solibaculum mannosilyticum</i>                | 1.53 (0.0401)        | NA        | NA             | NA             | NA                  | NA                   | NA             | 1        |
| <i>Streptococcus salivarius</i>                  | NA                   | NA        | NA             | NA             | NA                  | -1.34 (0.0058)       | NA             | 1        |
| <i>Streptococcus thermophilus</i>                | NA                   | NA        | NA             | NA             | -1.65 (6e-04)       | -1.7 (4e-04)         | NA             | 2        |
| <i>Sutterella wadsworthensis</i>                 | NA                   | NA        | NA             | NA             | NA                  | 3.84 (0.0012)        | NA             | 1        |
| <i>Turicibacter sp. H121</i>                     | NA                   | NA        | NA             | 3.06 (0.0194)  | NA                  | NA                   | NA             | 1        |
| <i>uncultured crAssphage</i>                     | NA                   | NA        | 4.31 (0.0446)  | NA             | NA                  | NA                   | NA             | 1        |
| <i>Vescimonas coprocola</i>                      | 1.51 (0.0401)        | NA        | NA             | NA             | NA                  | NA                   | NA             | 1        |
| <i>Vescimonas fastidiosa</i>                     | 1.52 (0.0156)        | NA        | NA             | 1.04 (0.0456)  | NA                  | NA                   | NA             | 2        |

**Table S11** – Differential Abundance Analysis results from DESeq2 for all KEGG Orthologs (Figure 1C). KEGG Orthologs were kept based on a p-value < 0.05 and |LFC| > 1. All KO showed significant differential abundance in CRC samples.

| Kegg_Code | KEGG_Name                                             | baseMean | log2FoldChange | lfcSE    | stat     | pvalue   | padj     |
|-----------|-------------------------------------------------------|----------|----------------|----------|----------|----------|----------|
| K00060    | threonine 3-dehydrogenase                             | 69.07531 | 1.028395       | 0.319799 | 3.215751 | 0.001301 | 0.005745 |
| K00424    | cytochrome bd-I ubiquinol oxidase subunit X           | 135.3327 | 1.422892       | 0.459479 | 3.096748 | 0.001957 | 0.007841 |
| K00639    | glycine C-acetyltransferase                           | 46.41648 | 1.248667       | 0.327628 | 3.811239 | 0.000138 | 0.001008 |
| K01447    | N-acetylmuramoyl-L-alanine amidase                    | 61.70871 | 1.439401       | 0.387466 | 3.714911 | 0.000203 | 0.001332 |
| K02022    | HlyD family secretion protein                         | 63.90342 | 1.384967       | 0.387107 | 3.577737 | 0.000347 | 0.001997 |
| K02230    | cobaltochelatase CobN                                 | 88.50592 | 1.307294       | 0.202913 | 6.442646 | 1.17E-10 | 3.18E-08 |
| K02377    | GDP-L-fucose synthase                                 | 61.99696 | 1.098058       | 0.145195 | 7.562665 | 3.95E-14 | 6.42E-11 |
| K07405    | alpha-amylase                                         | 62.67314 | 1.167109       | 0.19619  | 5.948884 | 2.70E-09 | 4.66E-07 |
| K09007    | GTP cyclohydrolase IB                                 | 64.51649 | 1.119168       | 0.32628  | 3.430087 | 0.000603 | 0.003123 |
| K09789    | pimeloyl-[acyl-carrier protein] methyl ester esterase | 73.89418 | 1.213231       | 0.17182  | 7.061056 | 1.65E-12 | 1.34E-09 |
